# Supplementary material for: Catalytic stereoselective synthesis of cyclopentanones from donor–acceptor cyclopropanes and in situ-generated ketenes
Source: Royal Society of Chemistry journal article supplement (doi:10.1039/d4ob01313a), 2024-01-01

# Catalytic Stereoselective Synthesis of Cyclopentanones from Donor-Acceptor Cyclopropanes and in situ-generated Ketenes

Shubhanjan Mitra<sup>a</sup>, Sophie M. Connolly<sup>a</sup>, Saud Ayidi<sup>a</sup>, Mukulesh Mondal<sup>b</sup>, Manashi Panda<sup>b</sup>,  
Brian G. Kelly<sup>c</sup> and Nessian J. Kerrigan<sup>\*a</sup>

<sup>a</sup>School of Chemical Sciences and Life Sciences Institute, Dublin City University, Glasnevin, Dublin 9, Ireland.

<sup>b</sup>Department of Chemistry, Oakland University, 2200 N. Squirrel Road, Rochester, MI 48309-4477, USA.

<sup>c</sup>KelAda Pharmachem, Belfield, Dublin 4, Ireland.

## NMR and HPLC spectra

### Table of Contents:

|                                                        |    |
|--------------------------------------------------------|----|
| <sup>1</sup> H & <sup>13</sup> C NMR of <b>3c</b>      | 3  |
| <sup>1</sup> H & <sup>13</sup> C NMR of <b>3d</b>      | 5  |
| <sup>1</sup> H & <sup>13</sup> C NMR of <b>3e</b>      | 7  |
| <sup>1</sup> H & <sup>13</sup> C NMR of <b>3f</b>      | 9  |
| <sup>1</sup> H & <sup>13</sup> C NMR of <b>3g</b>      | 11 |
| <sup>1</sup> H & <sup>13</sup> C NMR of <b>3h</b>      | 13 |
| <sup>1</sup> H & <sup>13</sup> C NMR of <b>3i</b>      | 15 |
| <sup>1</sup> H & <sup>13</sup> C NMR of <b>3j</b>      | 17 |
| <sup>1</sup> H & <sup>13</sup> C NMR of <b>3k</b>      | 19 |
| <sup>1</sup> H & <sup>13</sup> C NMR of <b>3l</b>      | 21 |
| <sup>1</sup> H & <sup>13</sup> C NMR of <b>3m</b>      | 23 |
| <sup>1</sup> H & <sup>13</sup> C NMR of <b>3n</b>      | 25 |
| <sup>1</sup> H & <sup>13</sup> C NMR of <b>3o</b>      | 27 |
| <sup>1</sup> H & <sup>13</sup> C NMR of <b>3p</b>      | 29 |
| <sup>1</sup> H & <sup>13</sup> C NMR of <b>3q</b>      | 31 |
| <sup>1</sup> H & <sup>13</sup> C NMR of <b>3r</b>      | 33 |
| <sup>1</sup> H & <sup>13</sup> C NMR of <b>3s</b>      | 35 |
| <sup>1</sup> H & <sup>13</sup> C NMR of (–)- <b>3c</b> | 37 |
| <sup>1</sup> H & <sup>13</sup> C NMR of (+)- <b>3c</b> | 39 |

|                                                        |    |
|--------------------------------------------------------|----|
| HPLC of (±)- <b>3c</b>                                 | 41 |
| HPLC of (-)- <b>3c</b>                                 | 42 |
| HPLC of (+)- <b>3c</b>                                 | 43 |
| <sup>1</sup> H & <sup>13</sup> C NMR of (-)- <b>3d</b> | 44 |
| <sup>1</sup> H & <sup>13</sup> C NMR of (+)- <b>3d</b> | 46 |
| HPLC of (±)- <b>3d</b>                                 | 48 |
| HPLC of (-)- <b>3d</b>                                 | 49 |
| HPLC of (+)- <b>3d</b>                                 | 50 |
| <sup>1</sup> H & <sup>13</sup> C NMR of <b>5d</b>      | 51 |
| 2D-NOESY for <b>3c</b>                                 | 53 |

<sup>1</sup>H NMR of **3c**:

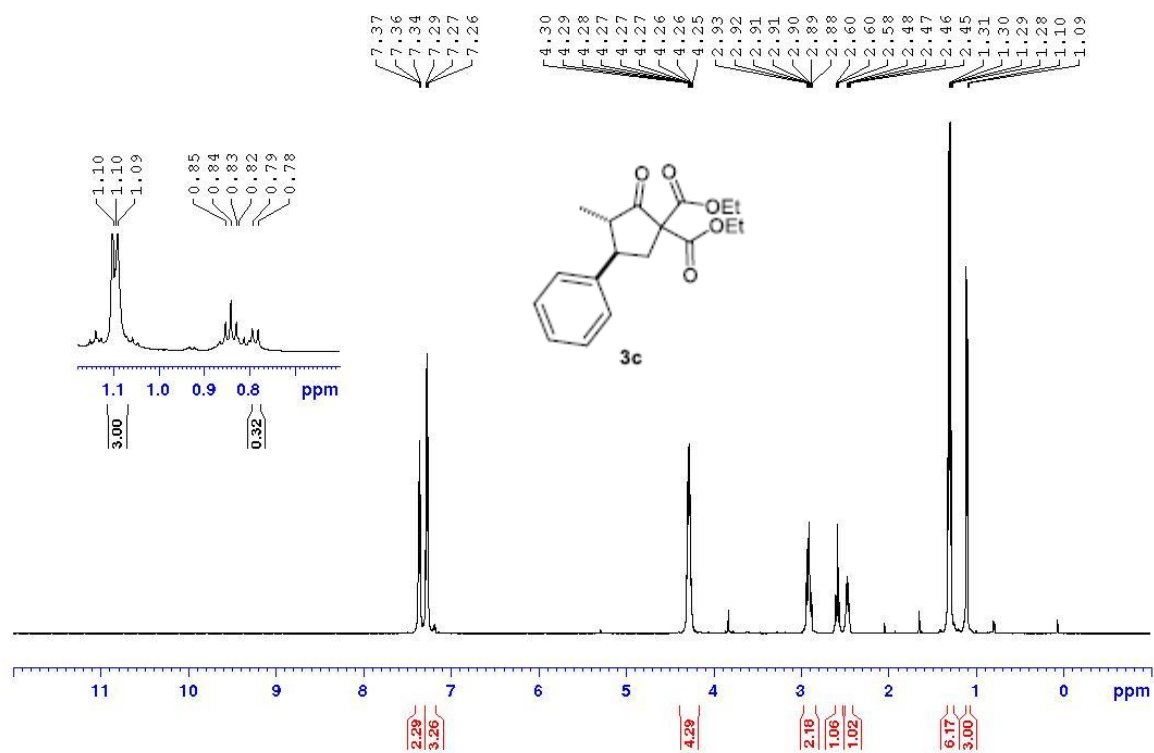

<sup>13</sup>C NMR of **3c**:

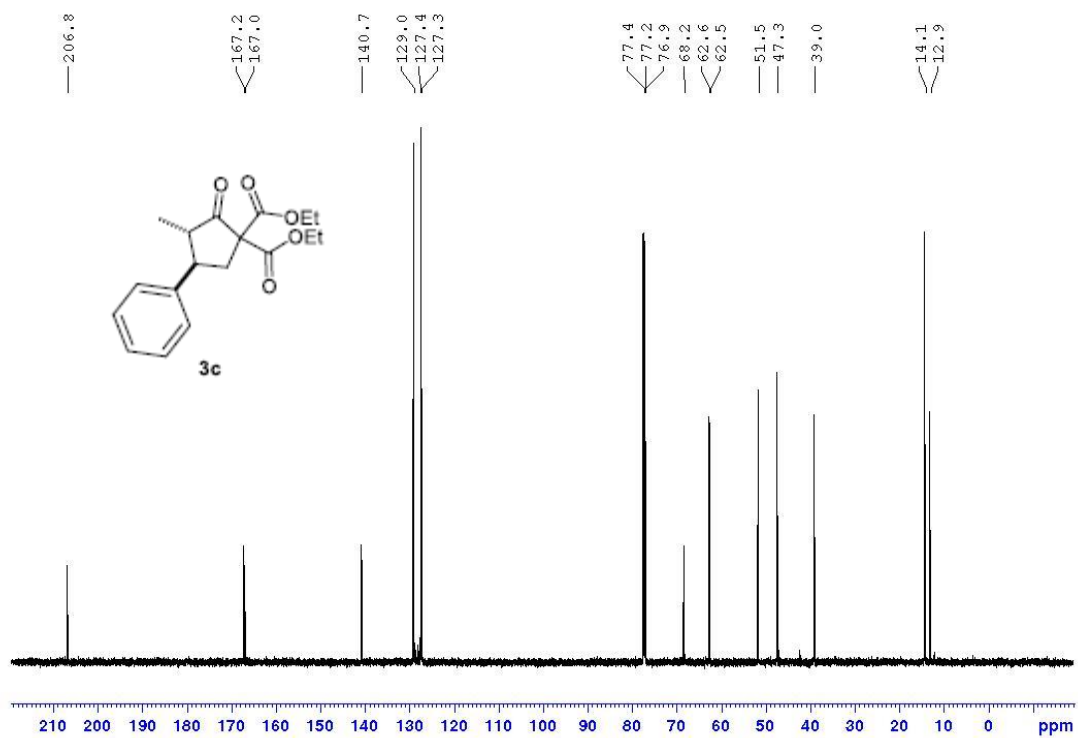

<sup>1</sup>H NMR of **3d**:

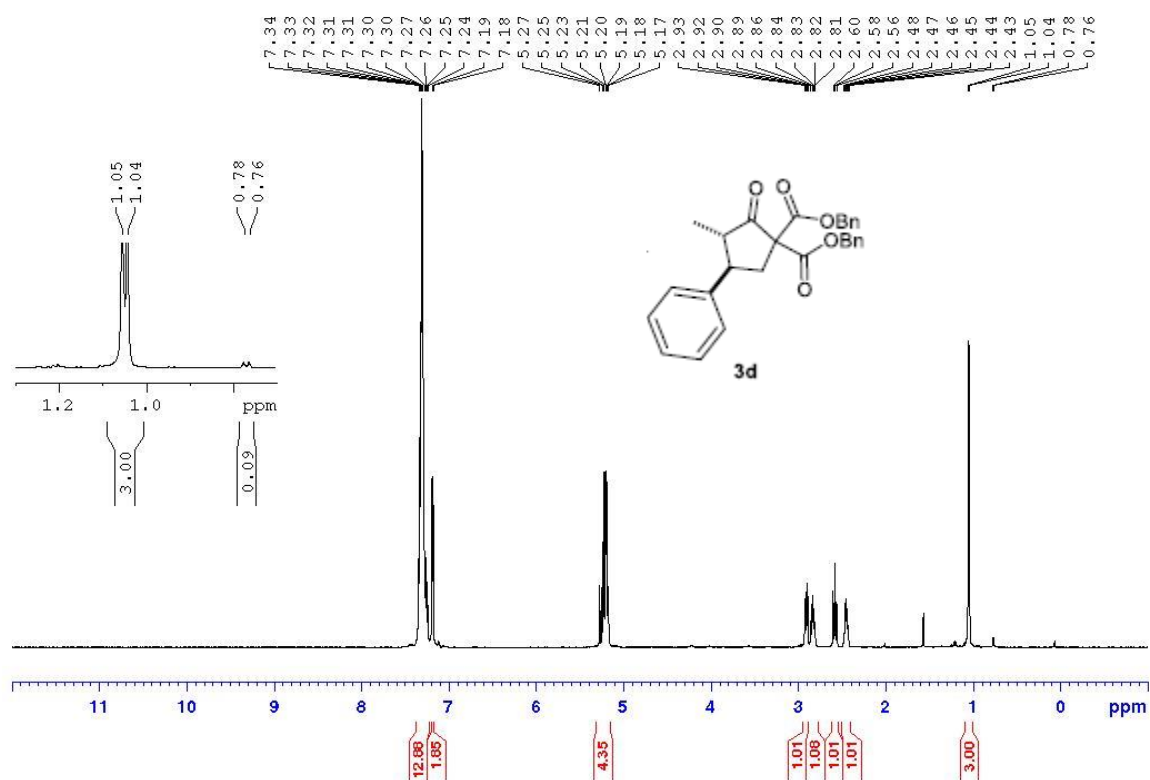

<sup>13</sup>C NMR of **3d**:

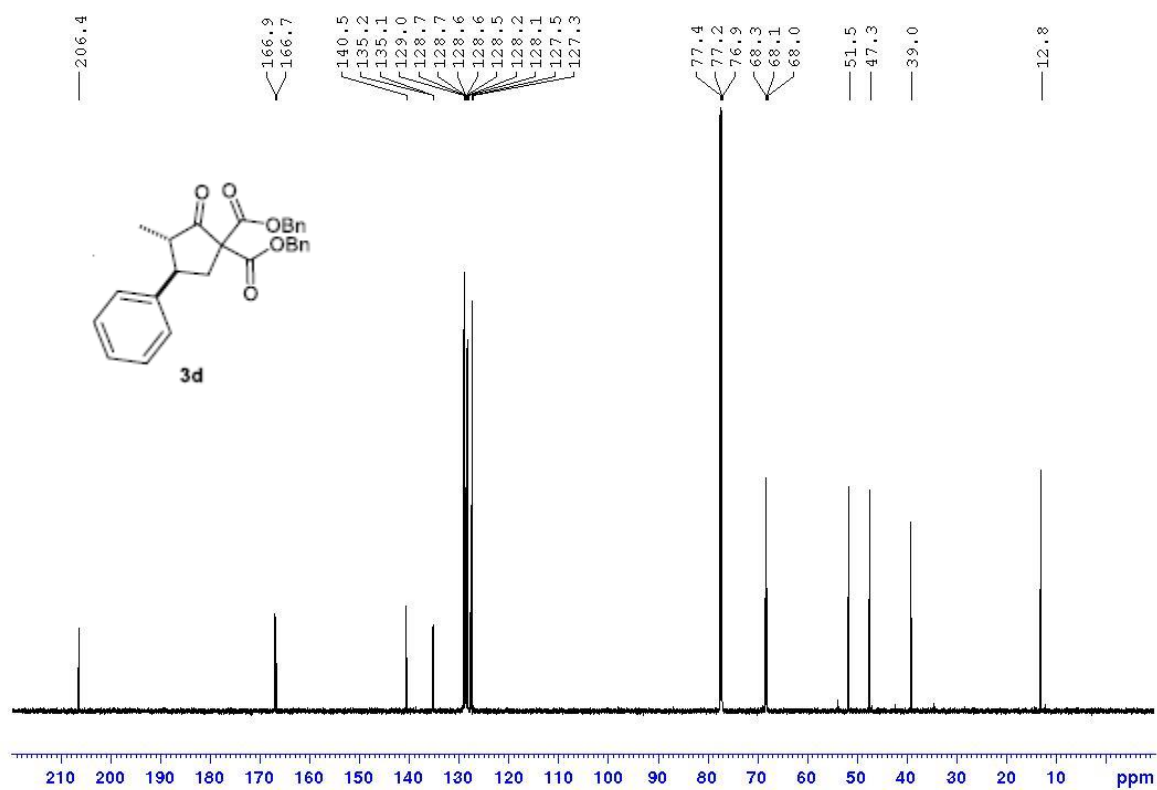

<sup>1</sup>H NMR of 3e:

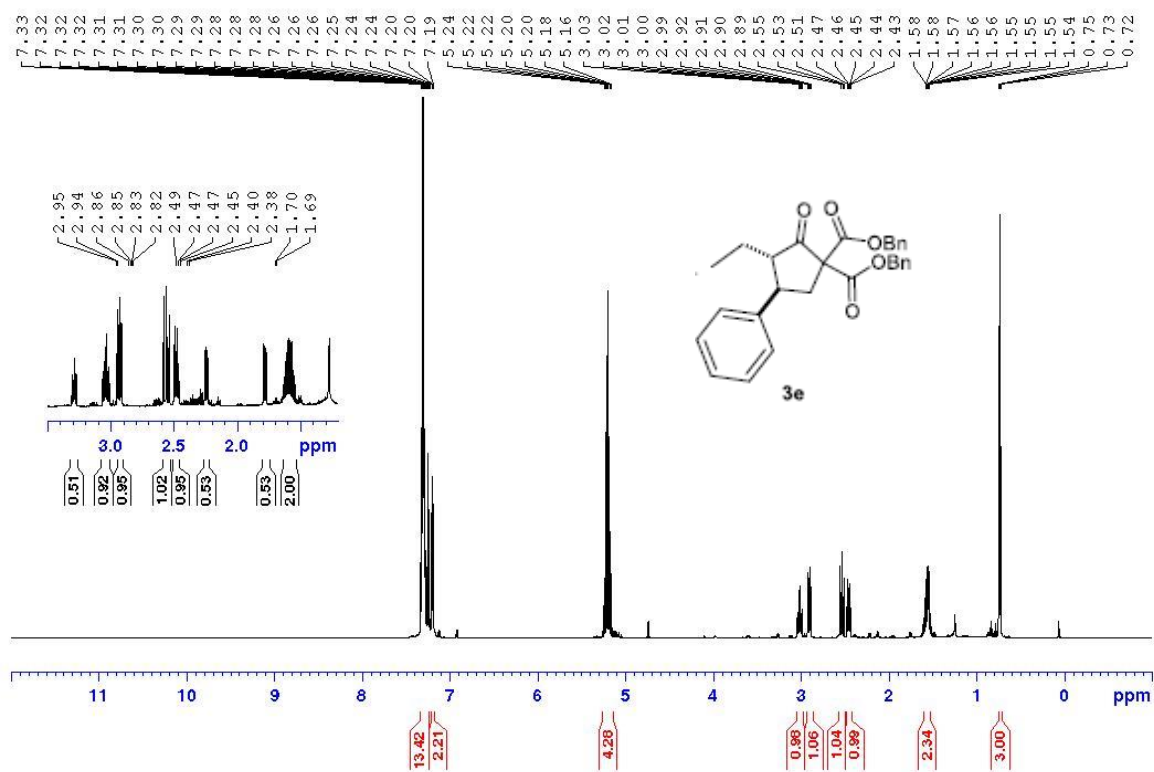

$^{13}\text{C}$  NMR of **3e**:

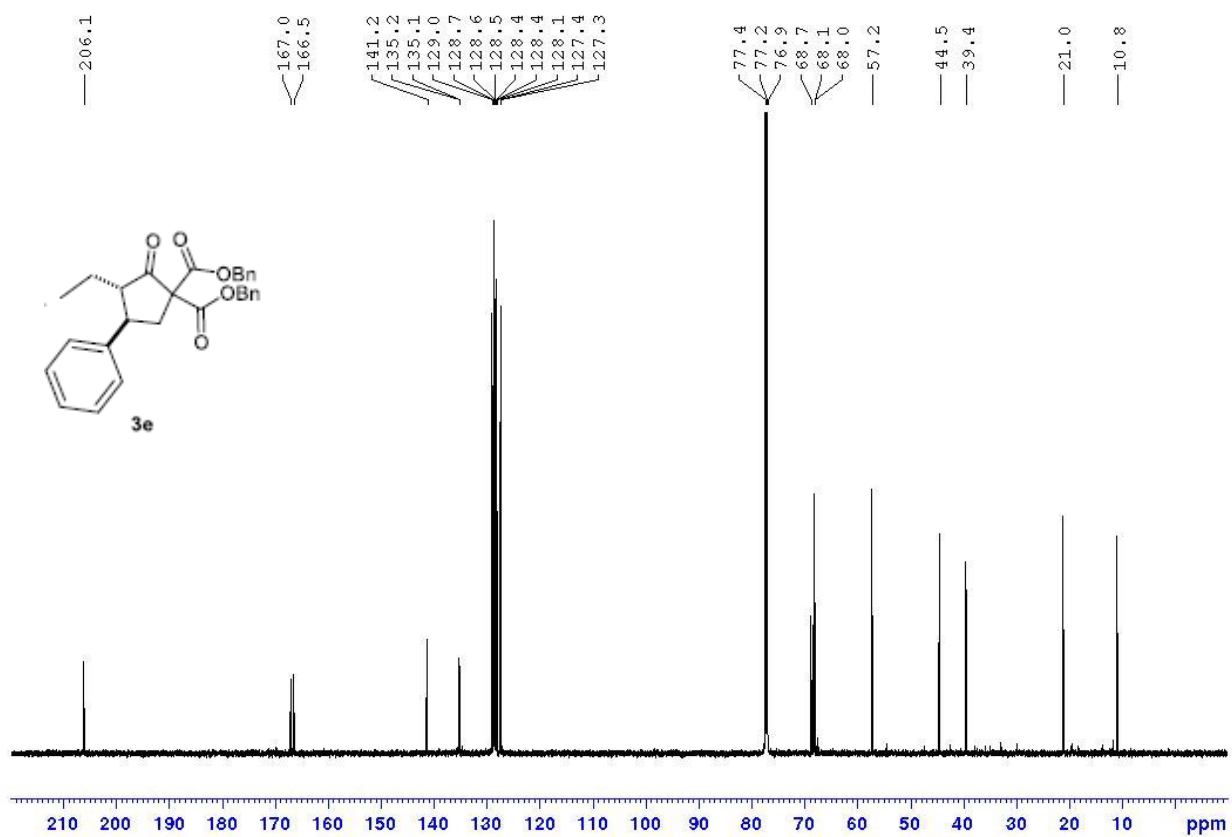



<sup>1</sup>H NMR of 3f:

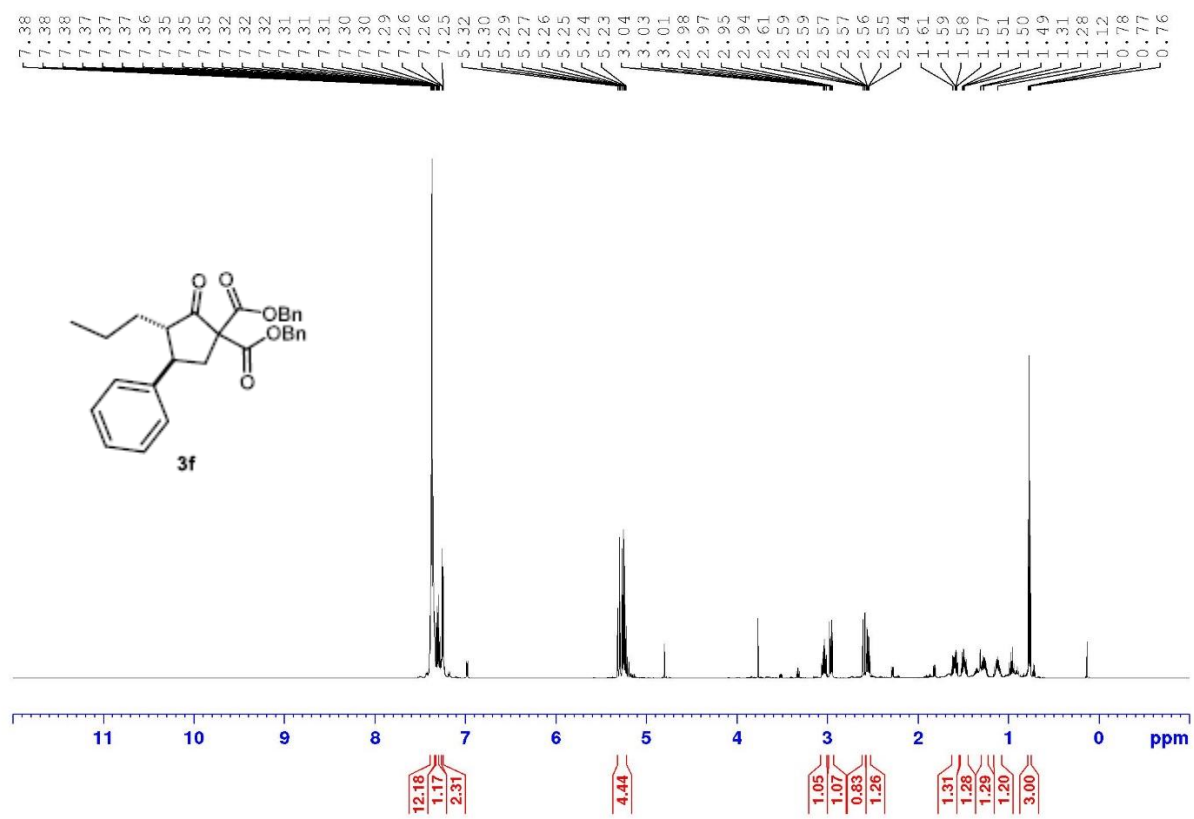

$^{13}\text{C}$  NMR of **3f**:

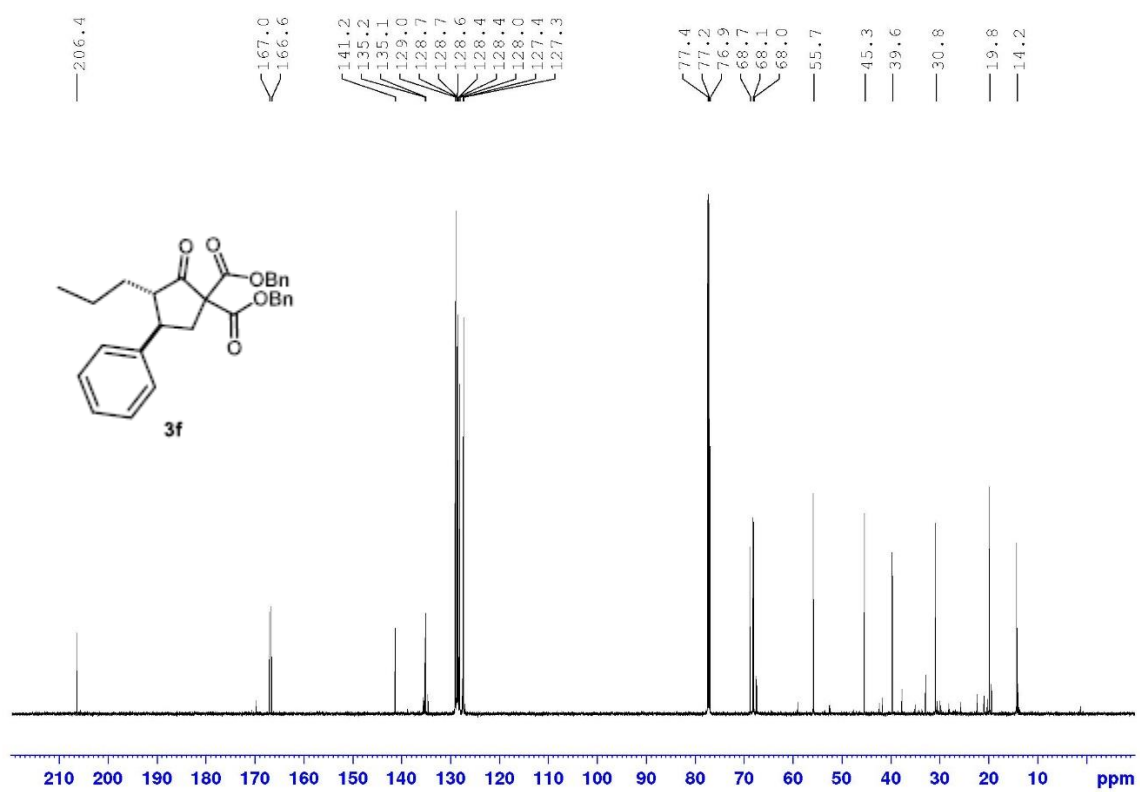

<sup>1</sup>H NMR of **3g**:

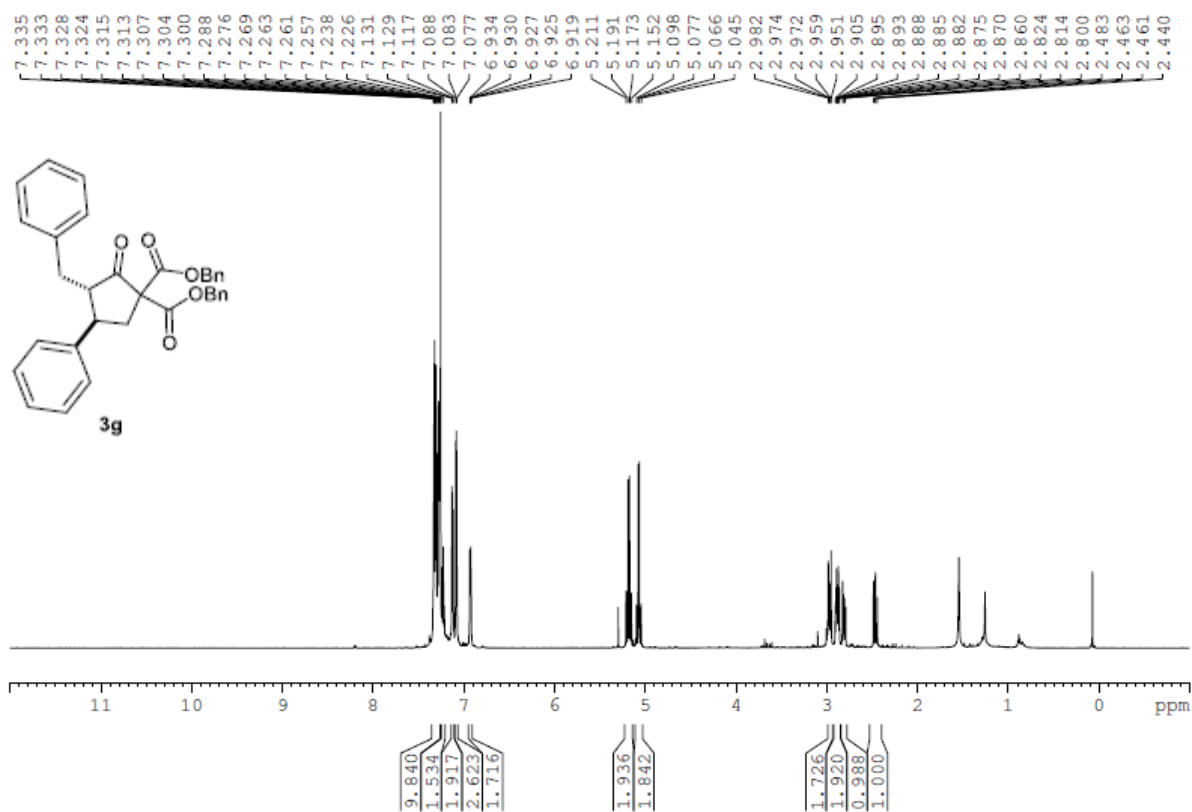

Crude <sup>1</sup>H NMR expansion:

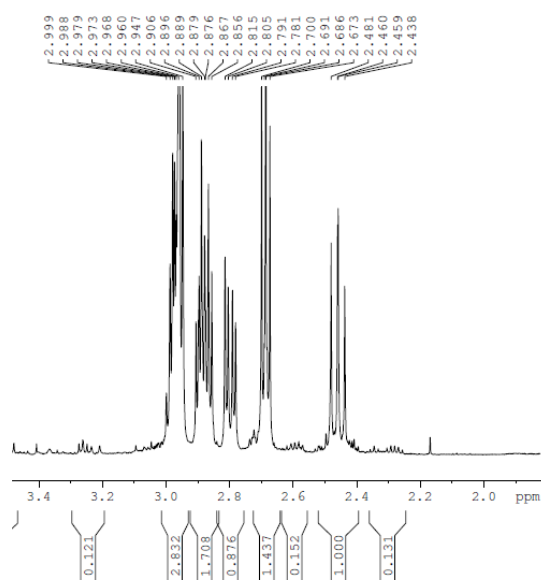

<sup>13</sup>C NMR of **3g**:

S872-SM-2910-129-B

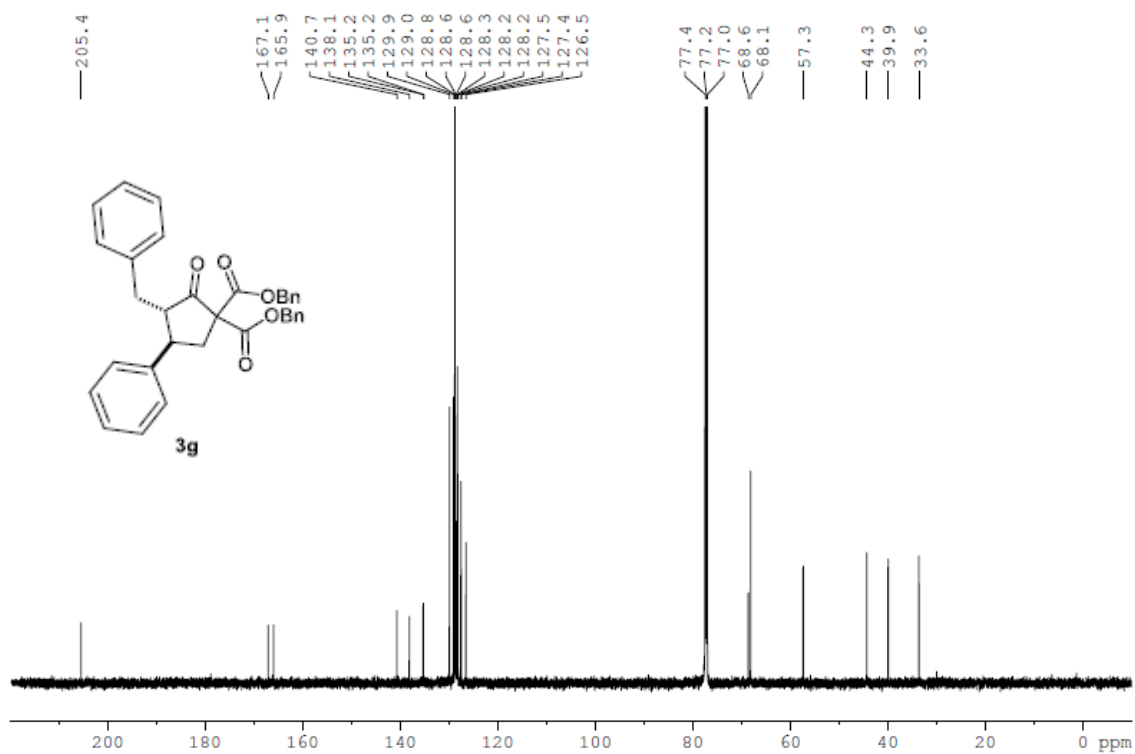

<sup>1</sup>H NMR of 3h:

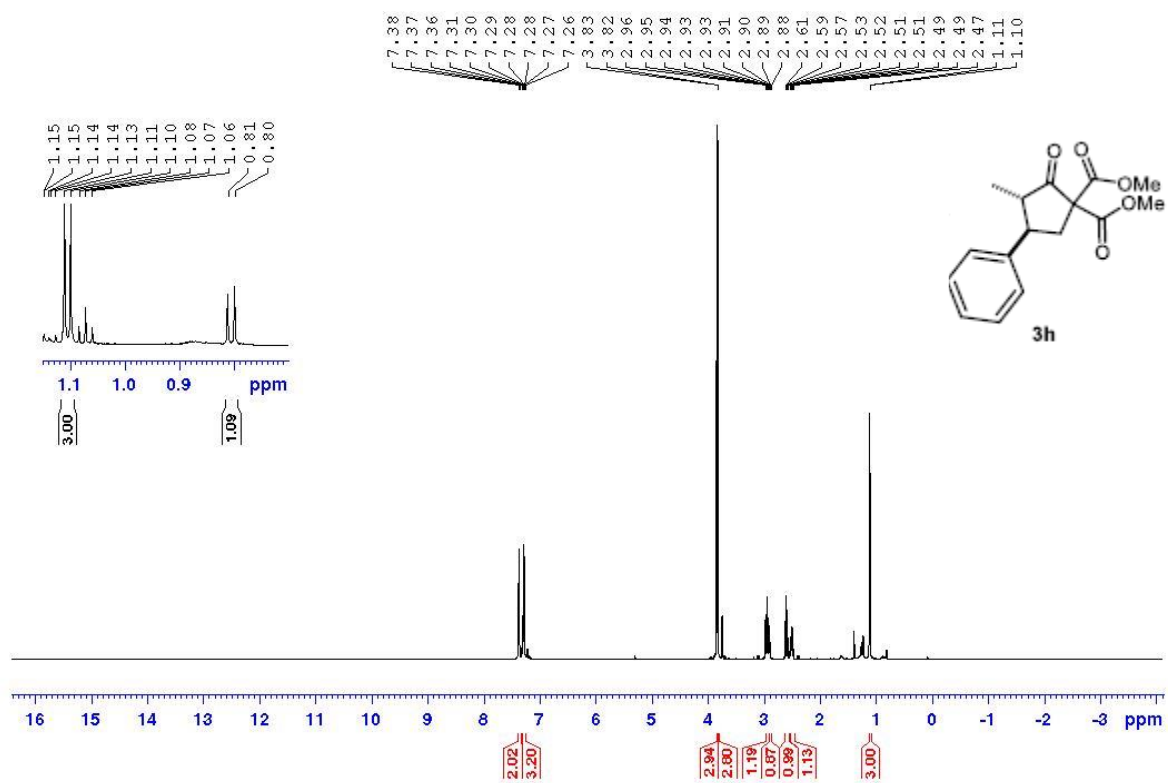

<sup>13</sup>C NMR of **3h**:

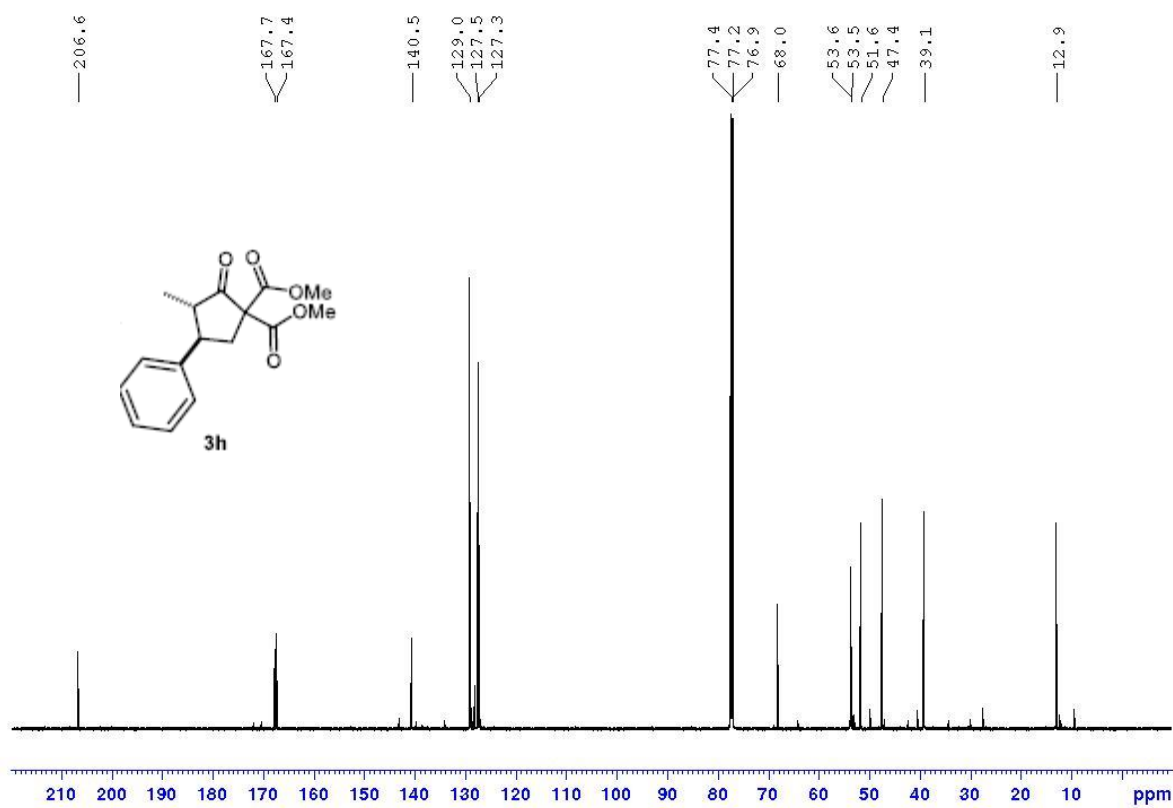

<sup>1</sup>H NMR of **3i**:

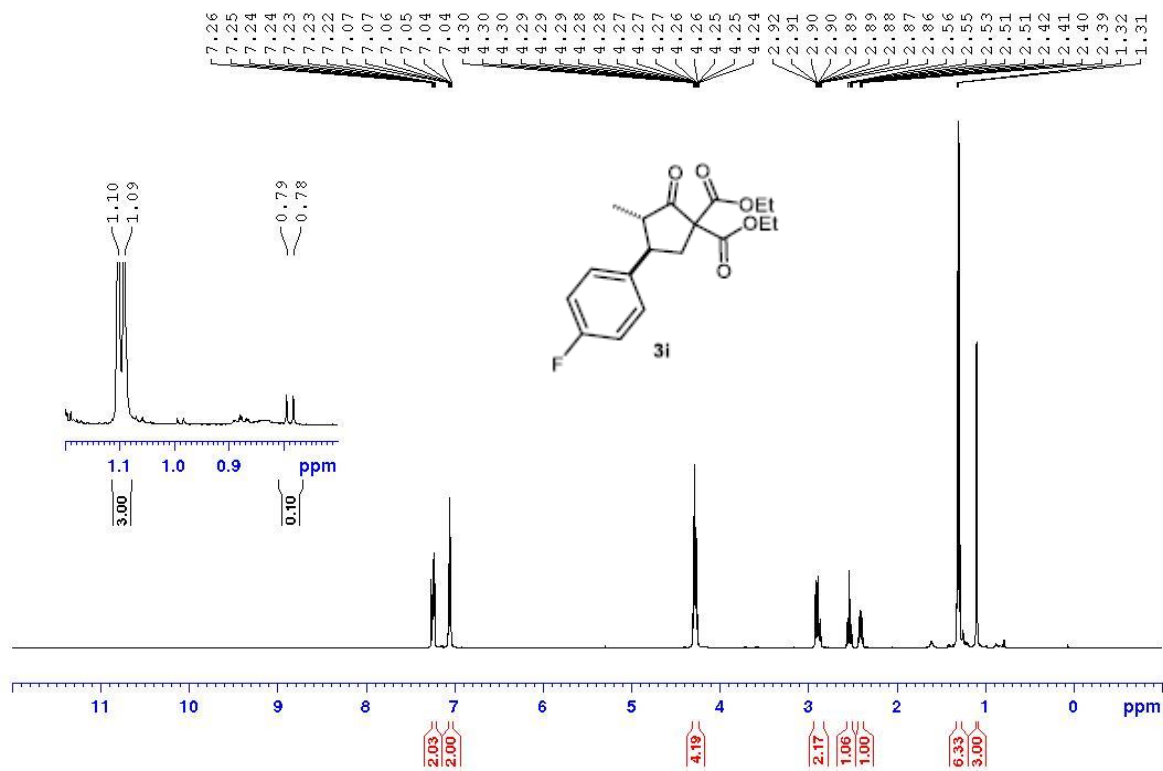

$^{13}\text{C}$  NMR of **3i**:

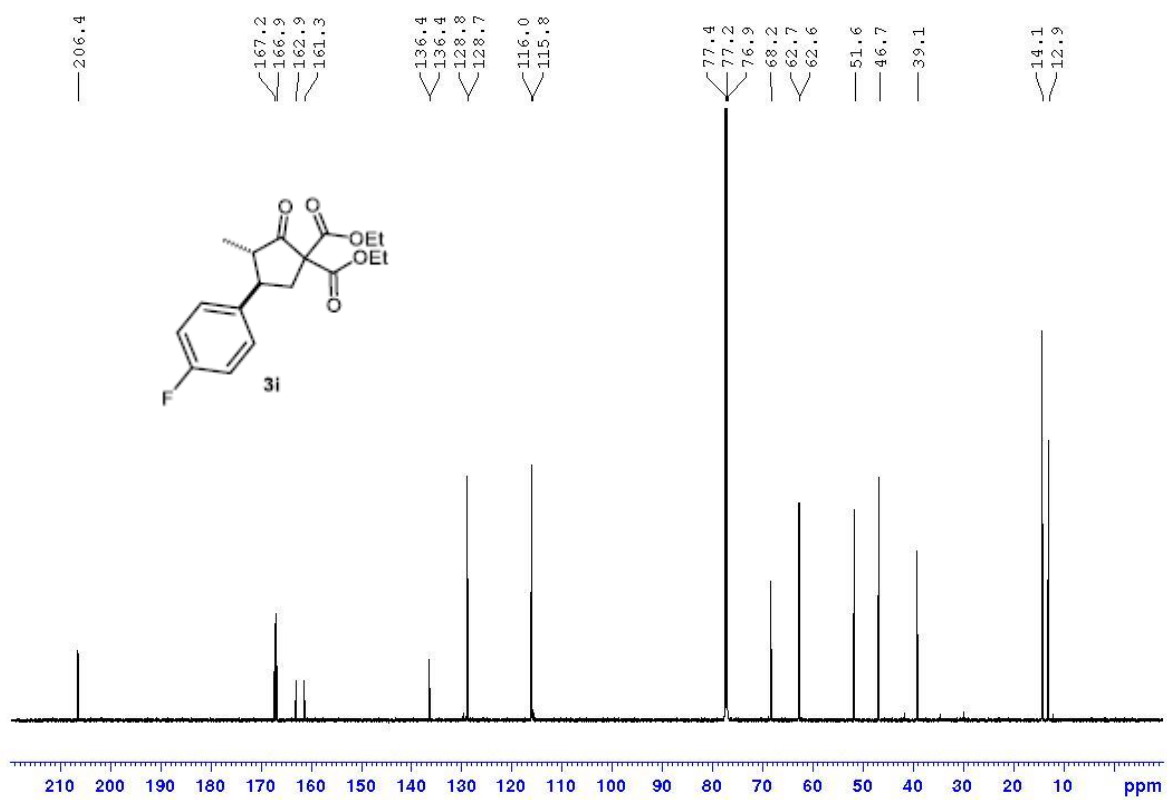



<sup>1</sup>H NMR of **3j**:

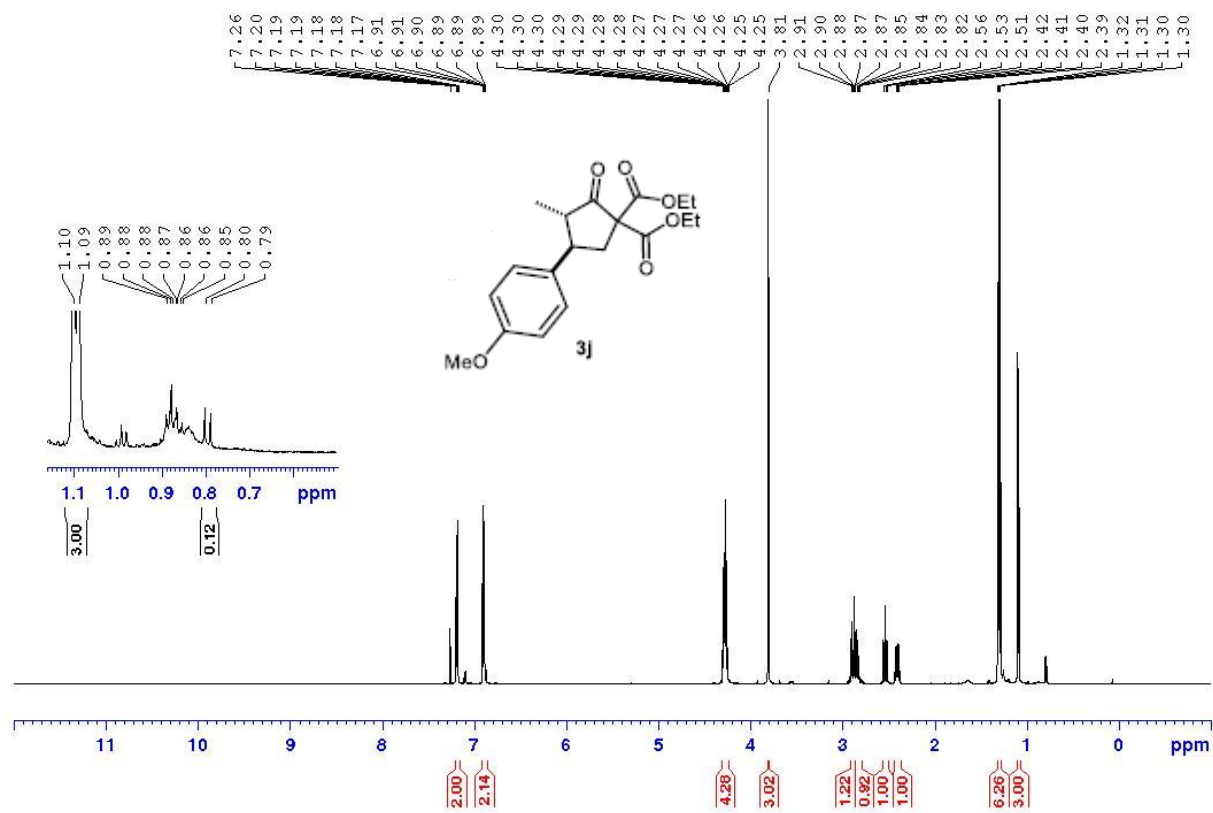

<sup>13</sup>C NMR of **3j**:

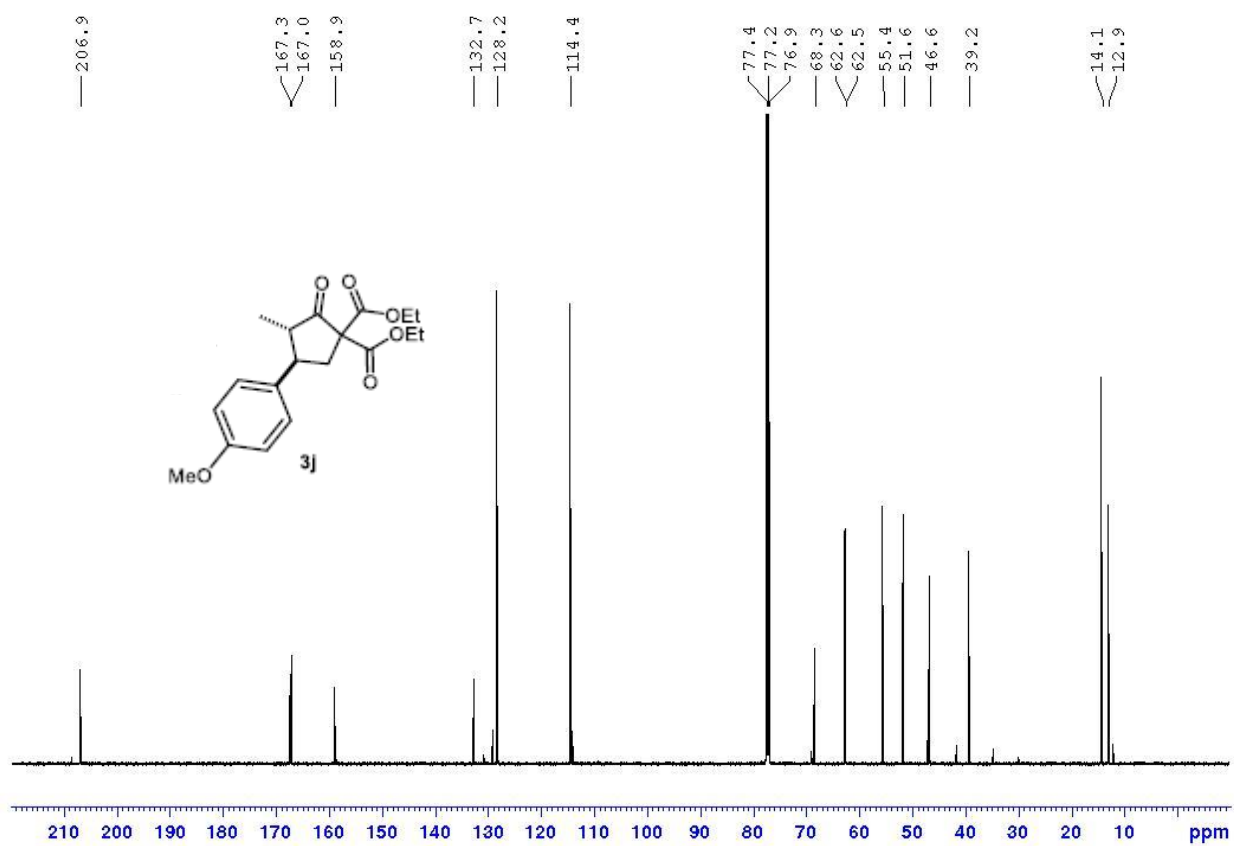

<sup>1</sup>H NMR of 3k:

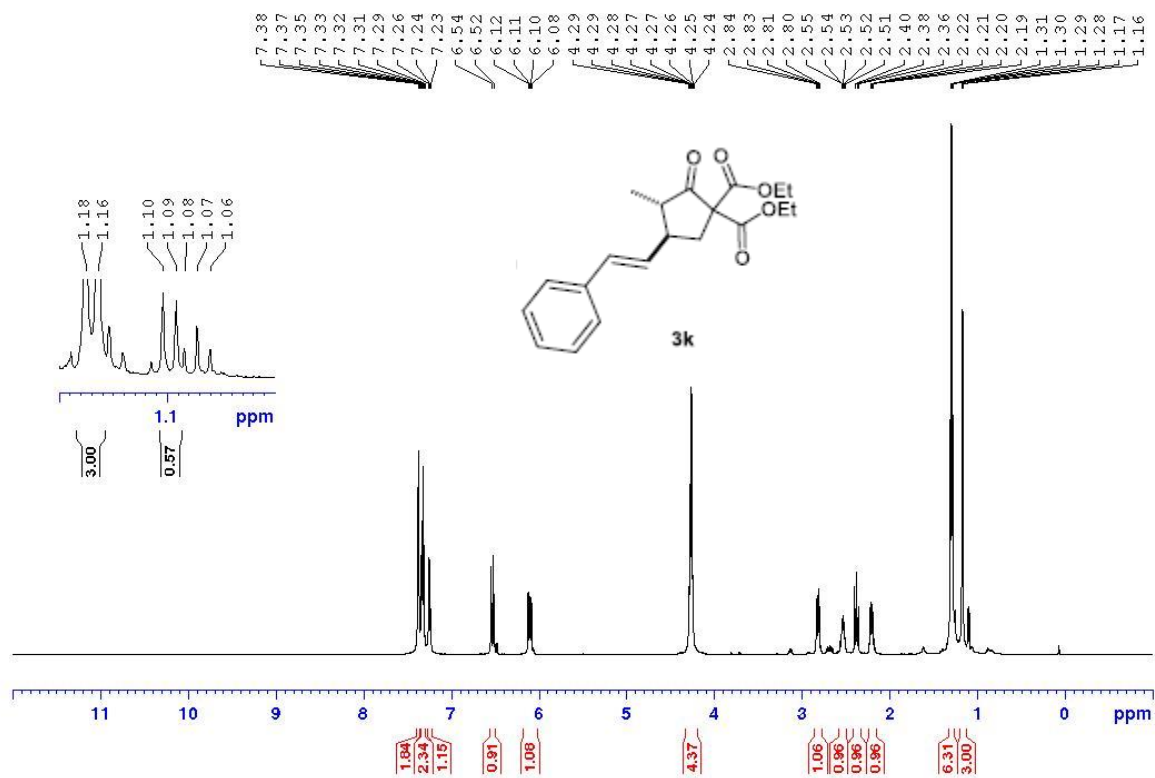

$^{13}\text{C}$  NMR of **3k**:

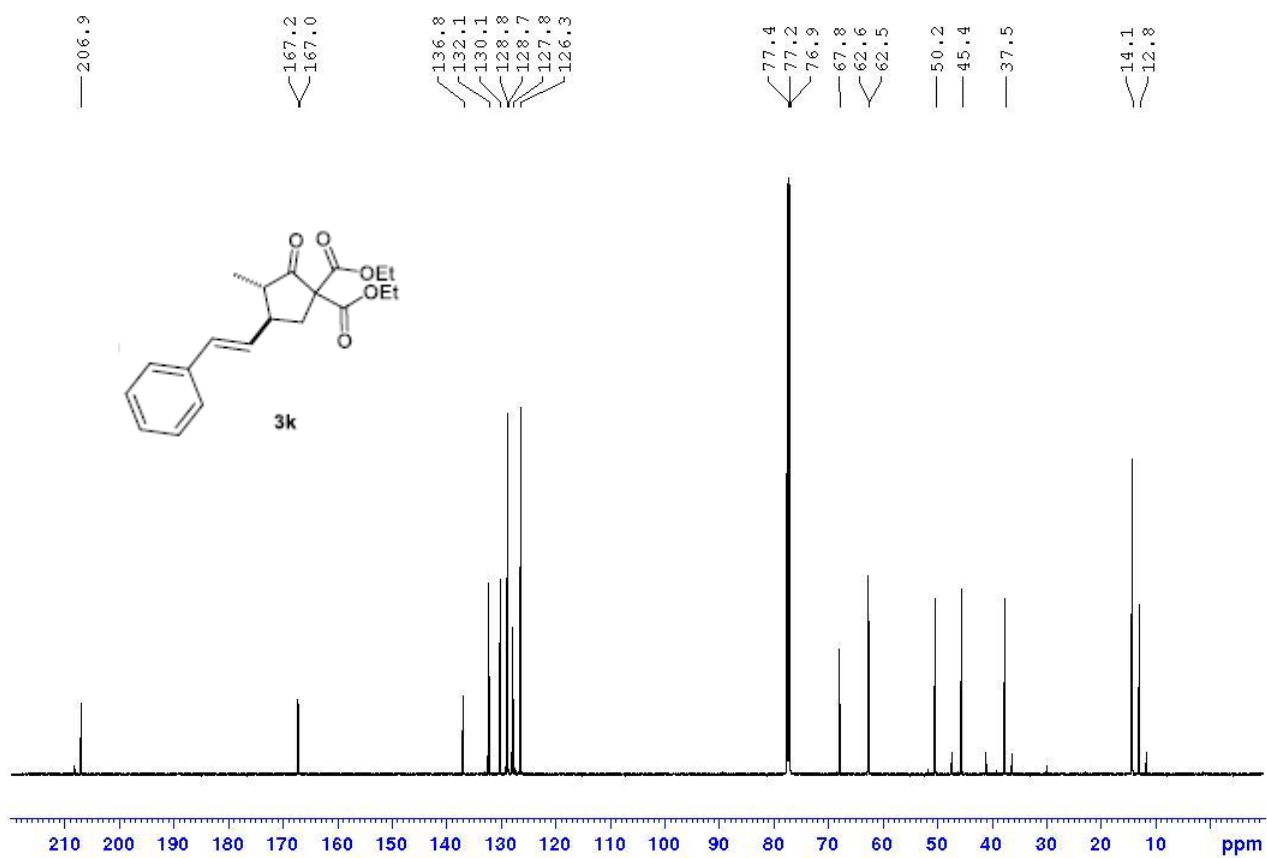

<sup>1</sup>H NMR of **3l**:

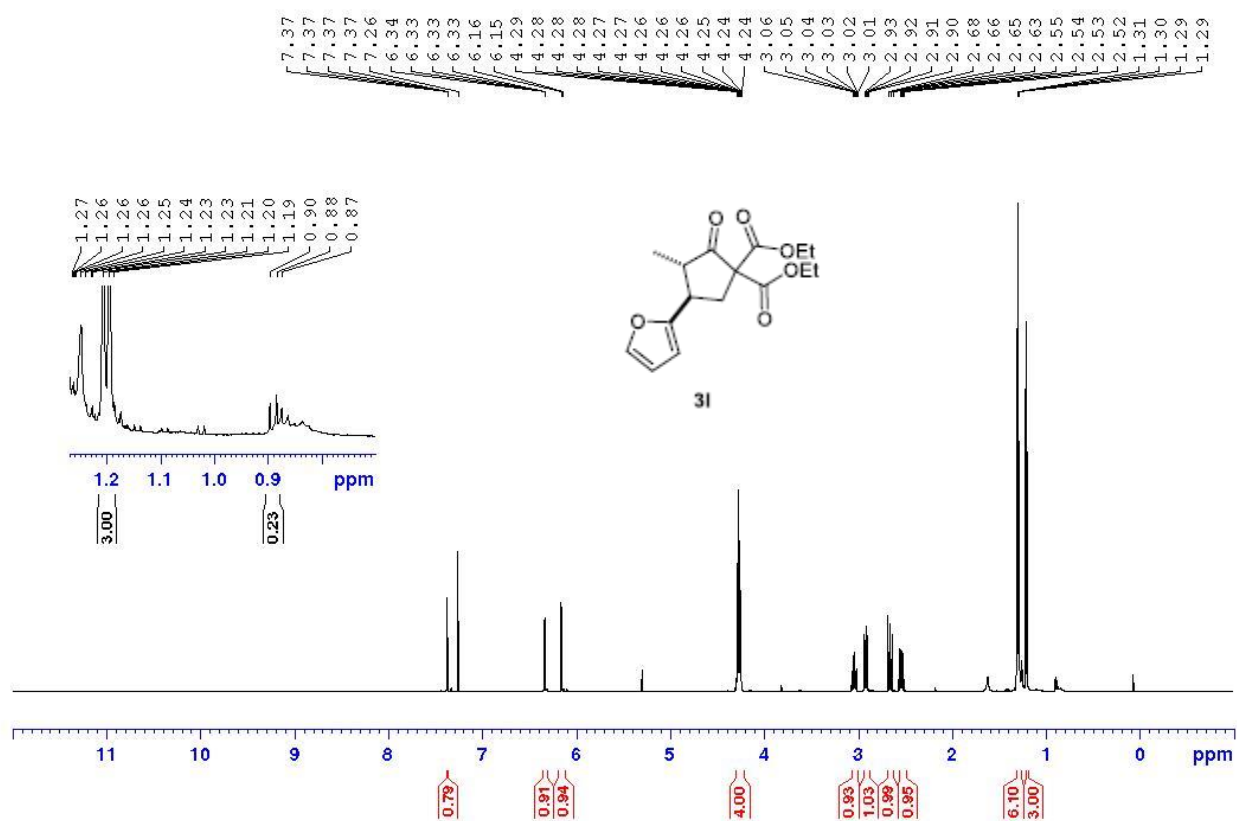

<sup>13</sup>C NMR of **3l**:

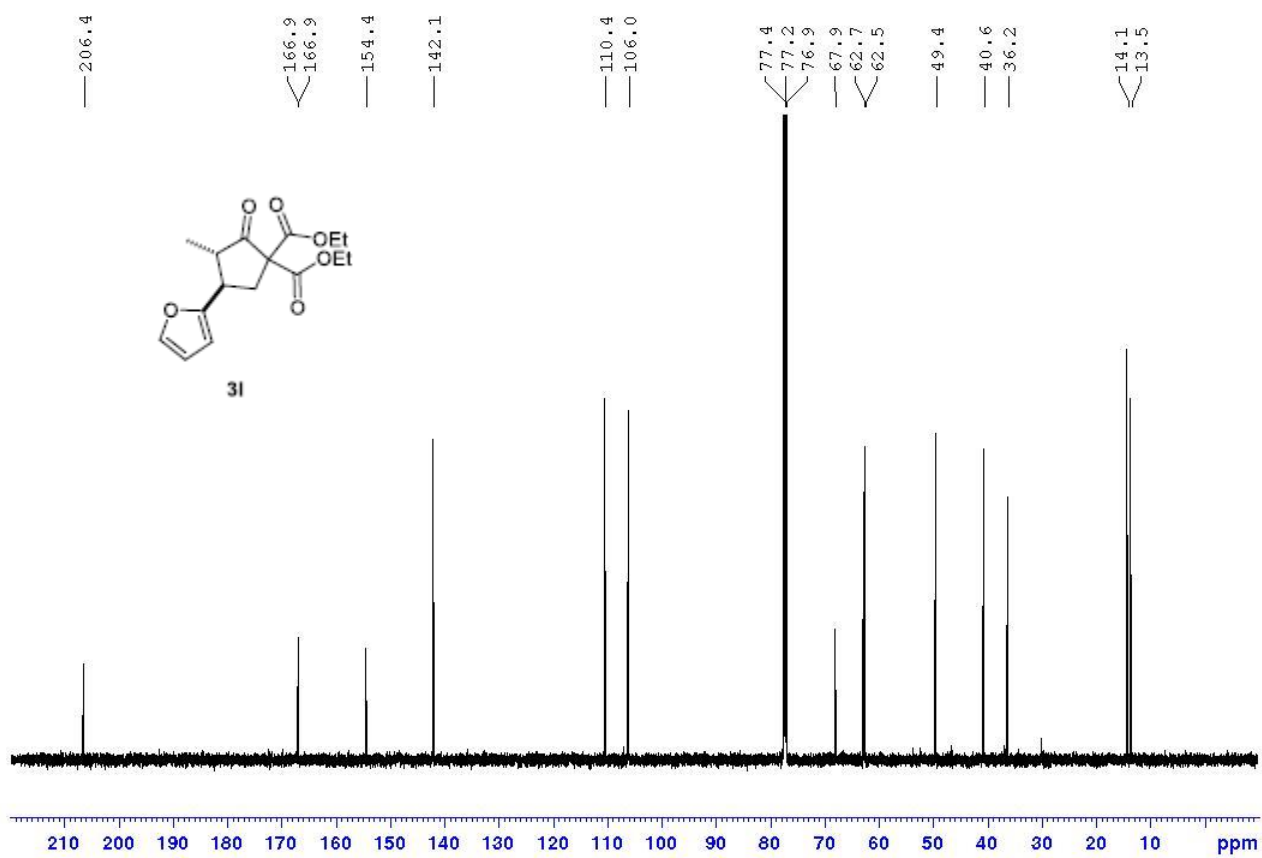

<sup>1</sup>H NMR of **3m**:

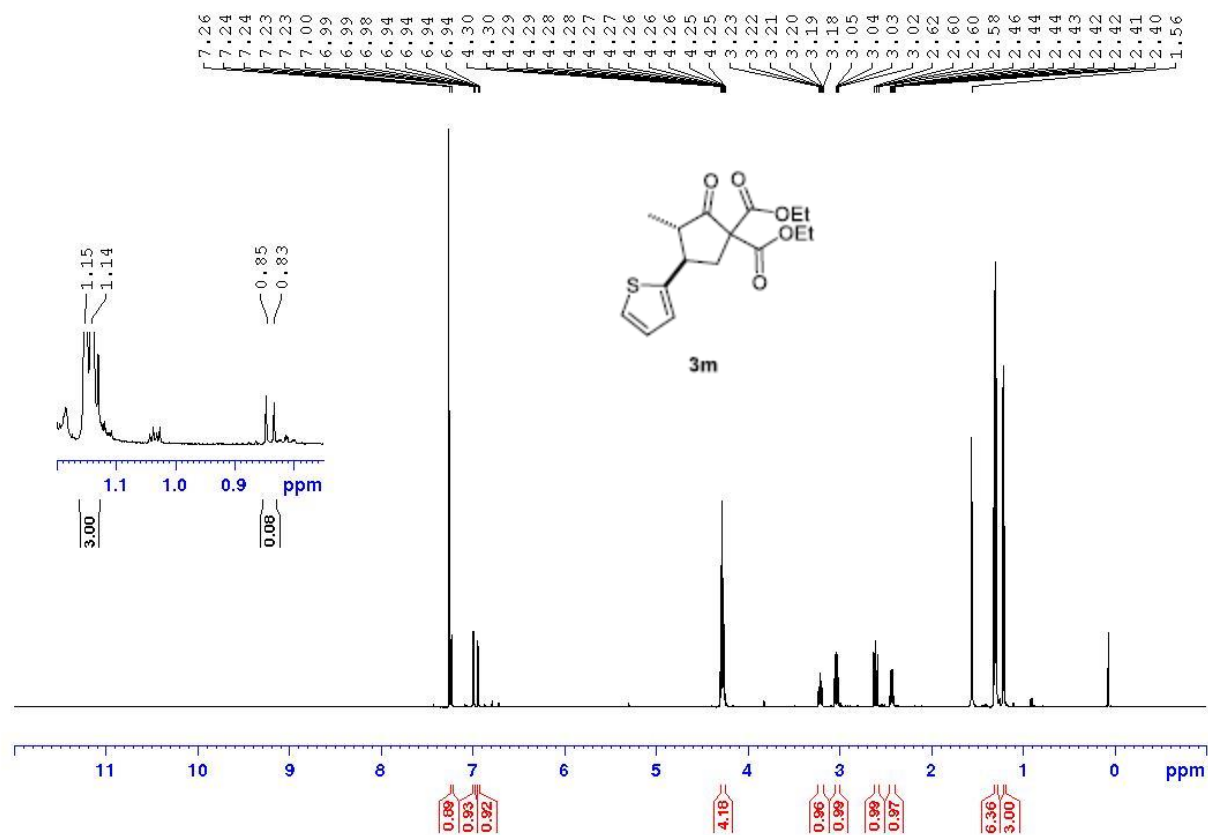

$^{13}\text{C}$  NMR of **3m**:

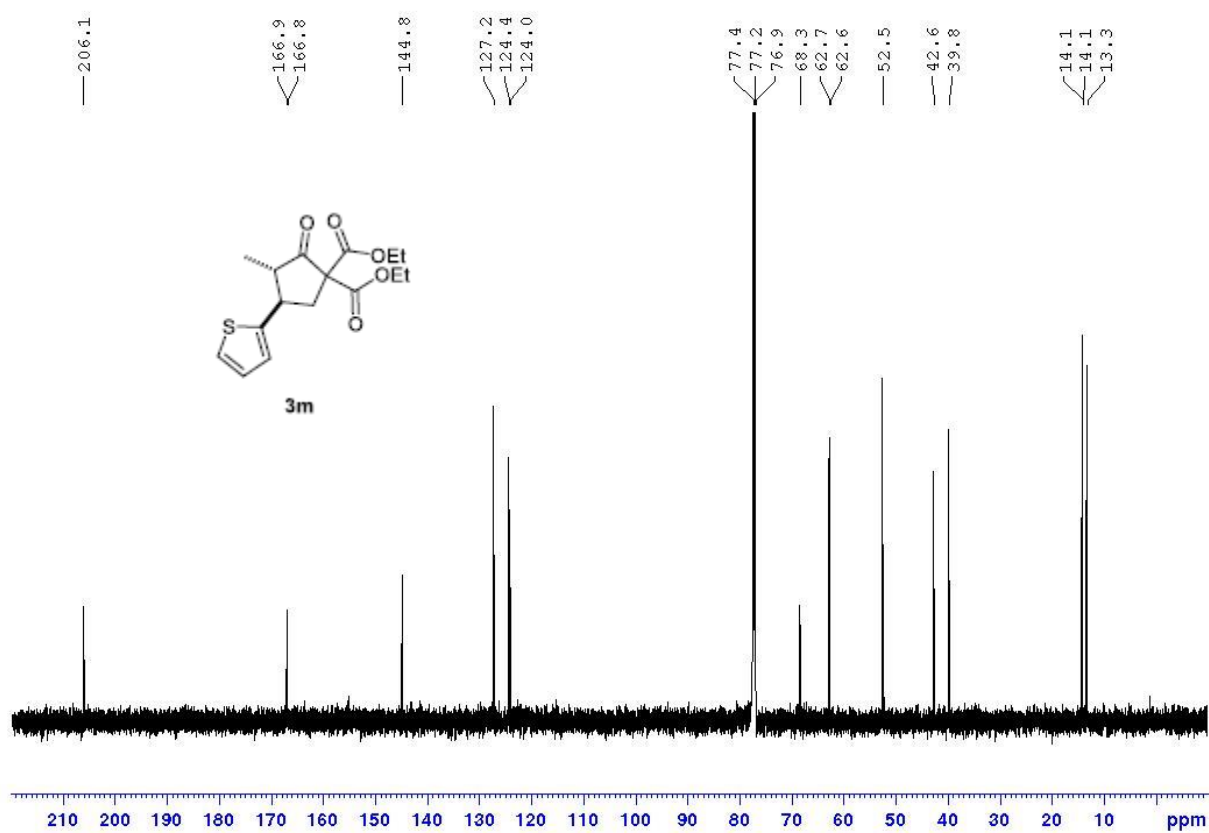



<sup>1</sup>H NMR of 3n:

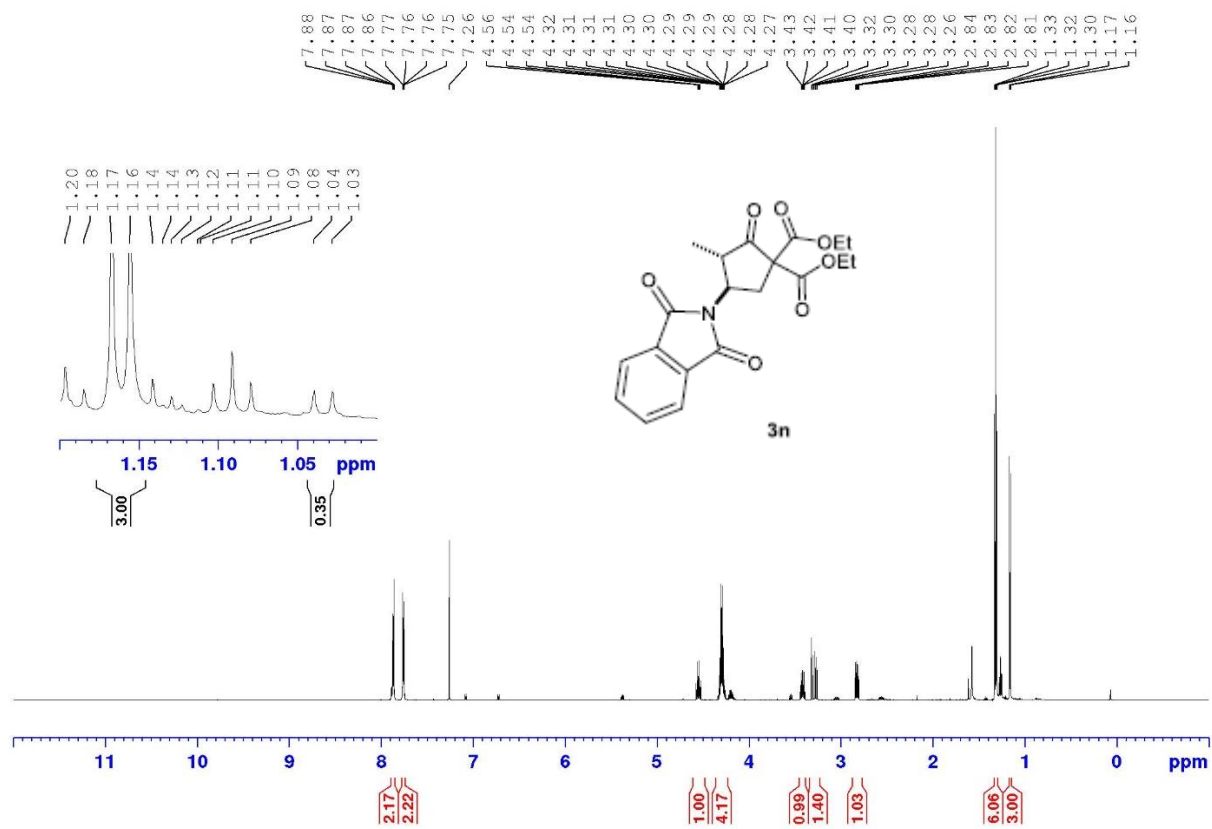

$^{13}\text{C}$  NMR of **3n**:

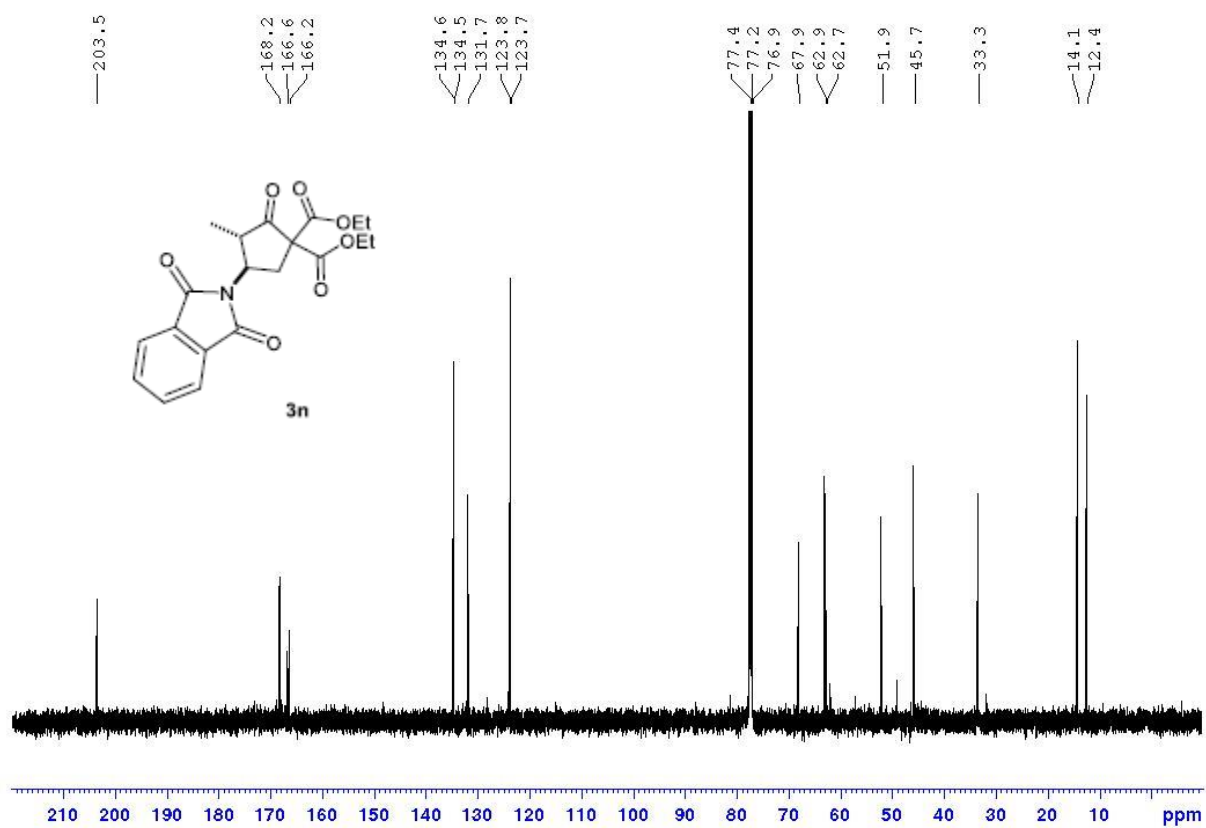

<sup>1</sup>H NMR of **3o**:

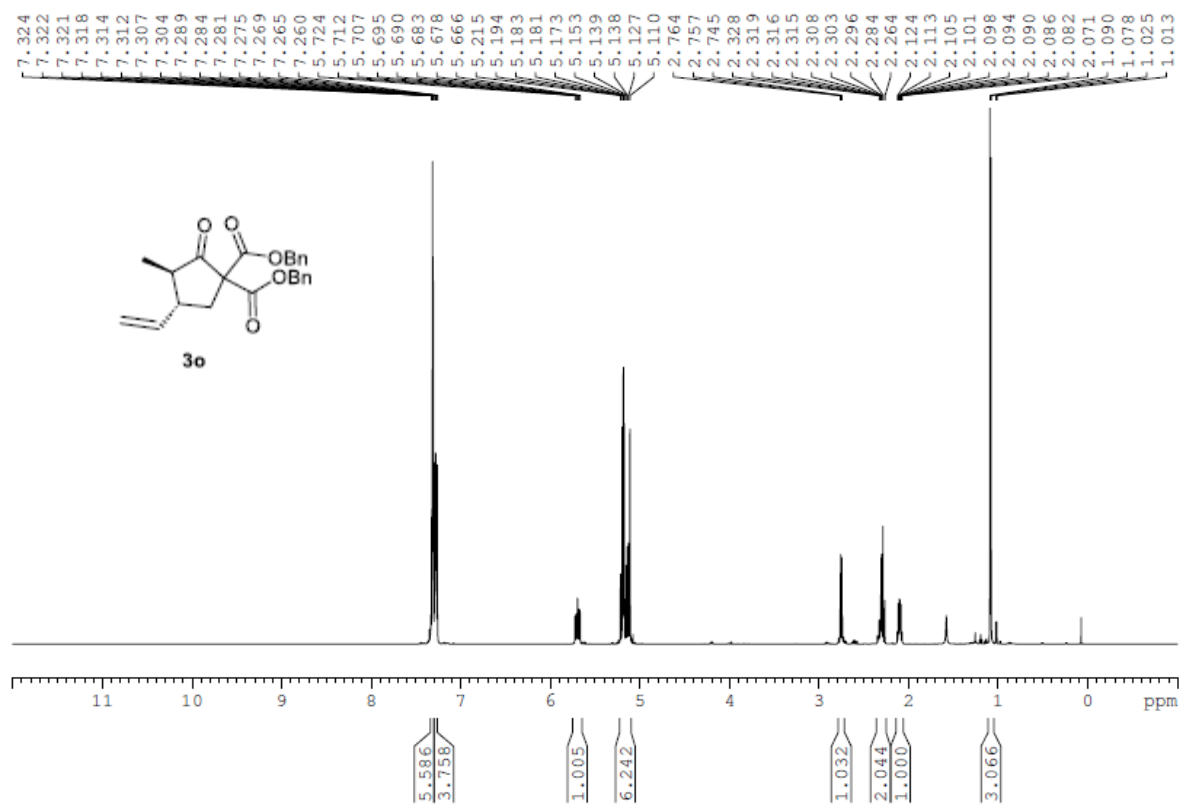

<sup>13</sup>C NMR of **3o**:

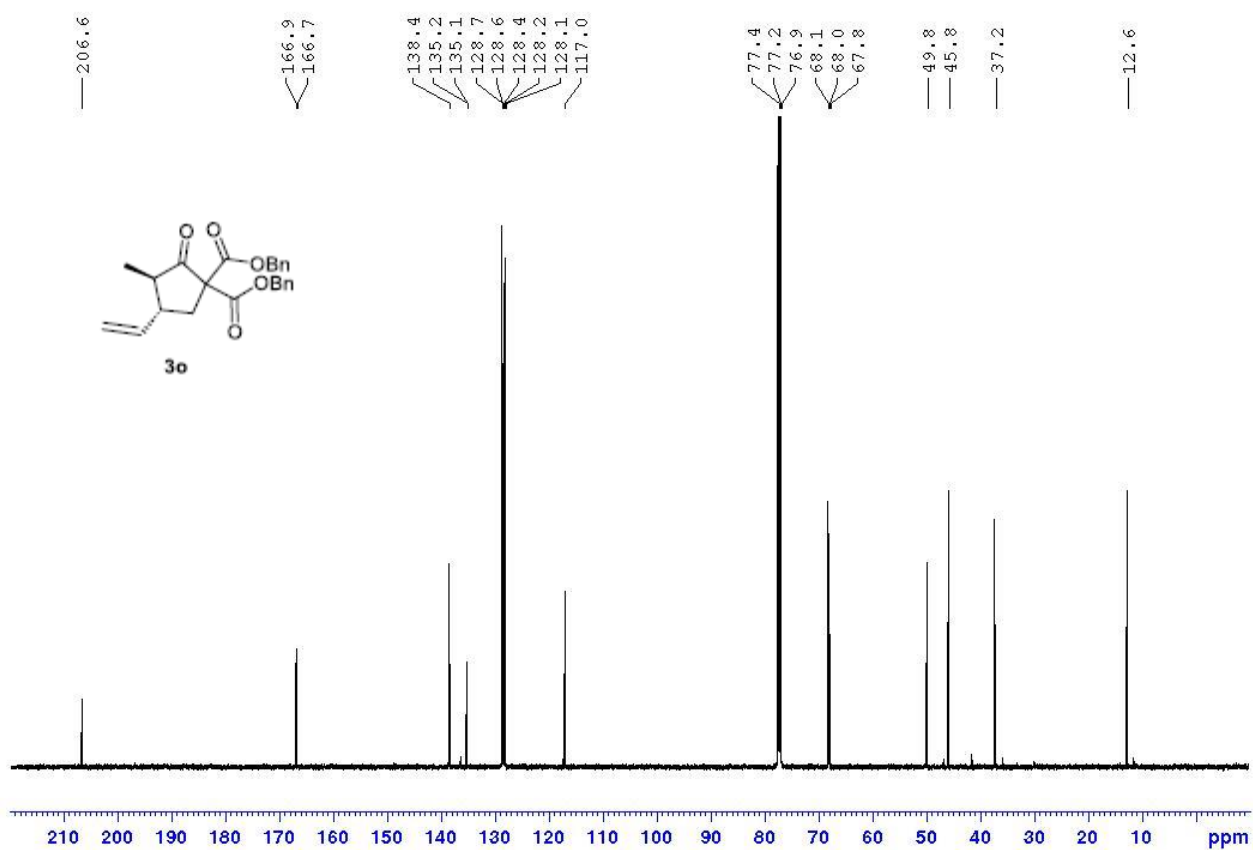

<sup>1</sup>H NMR of 3p:

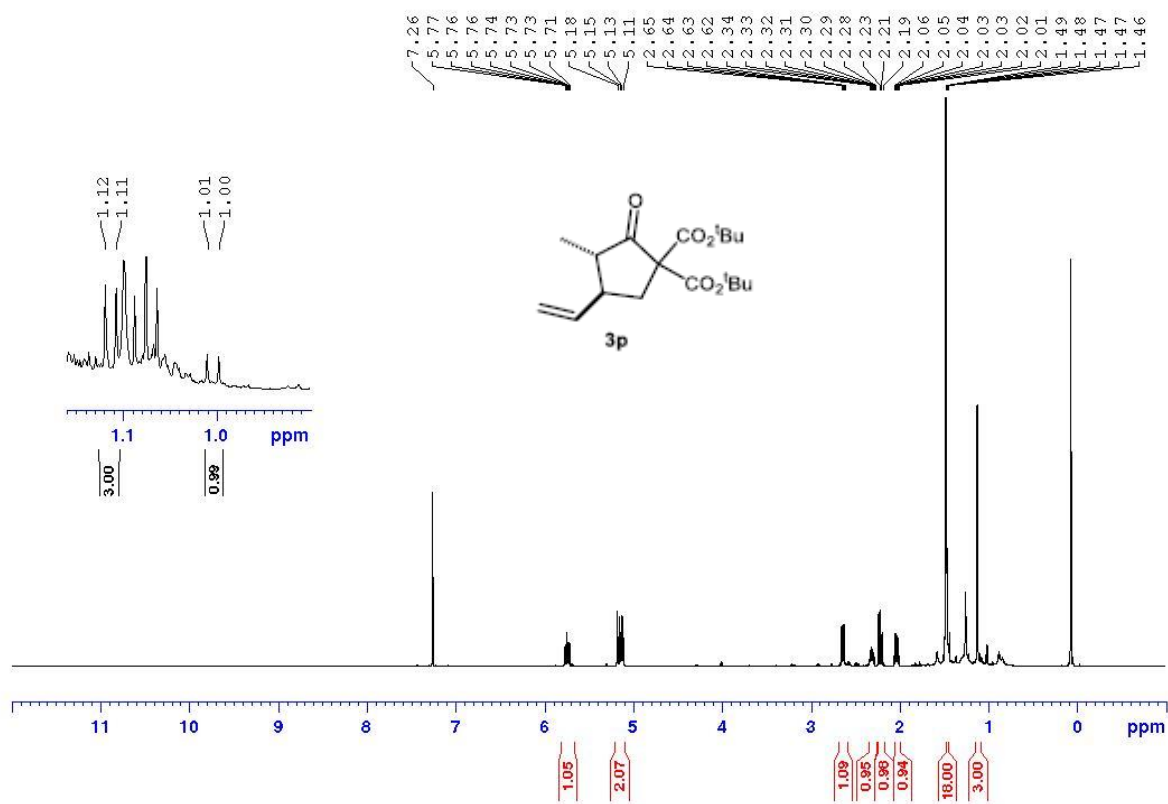

$^{13}\text{C}$  NMR of **3p**:

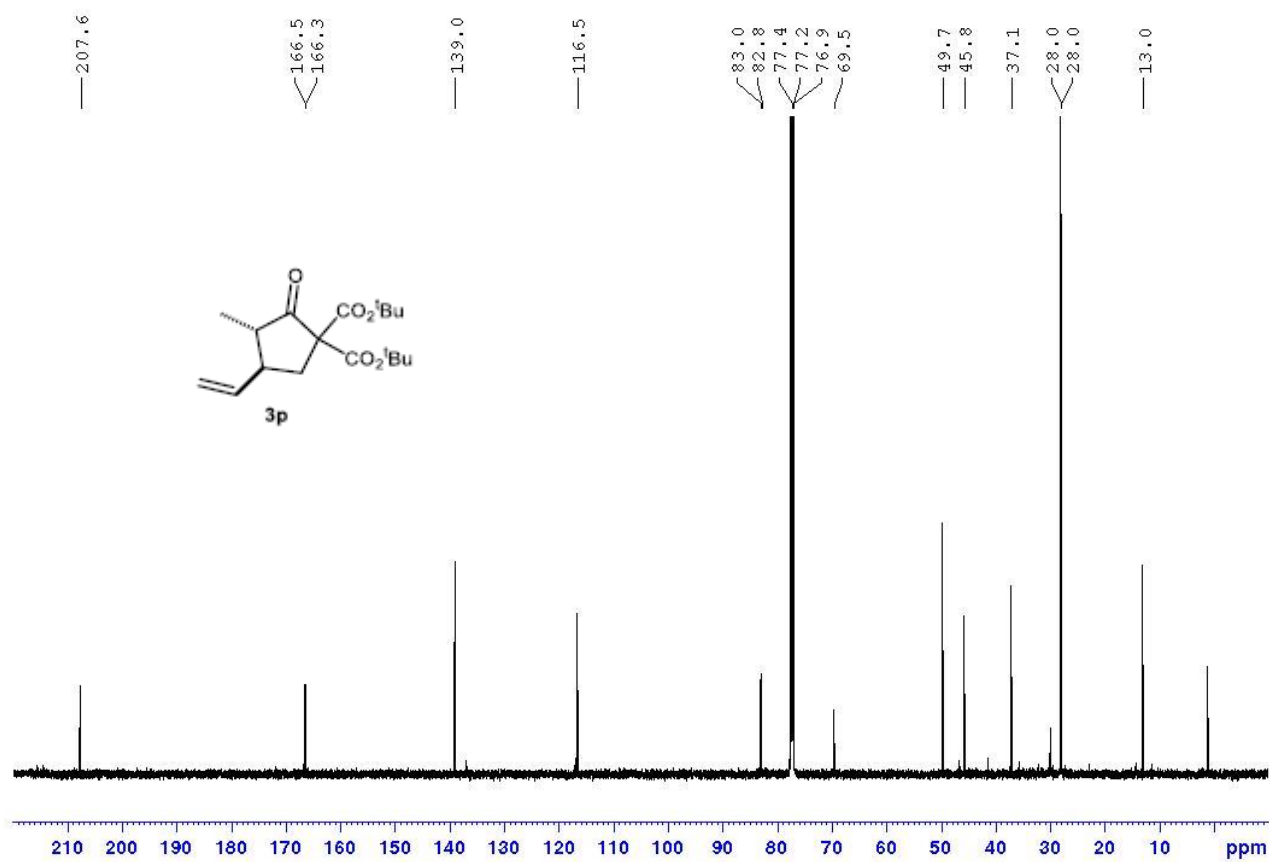

<sup>1</sup>H NMR of **3q**:

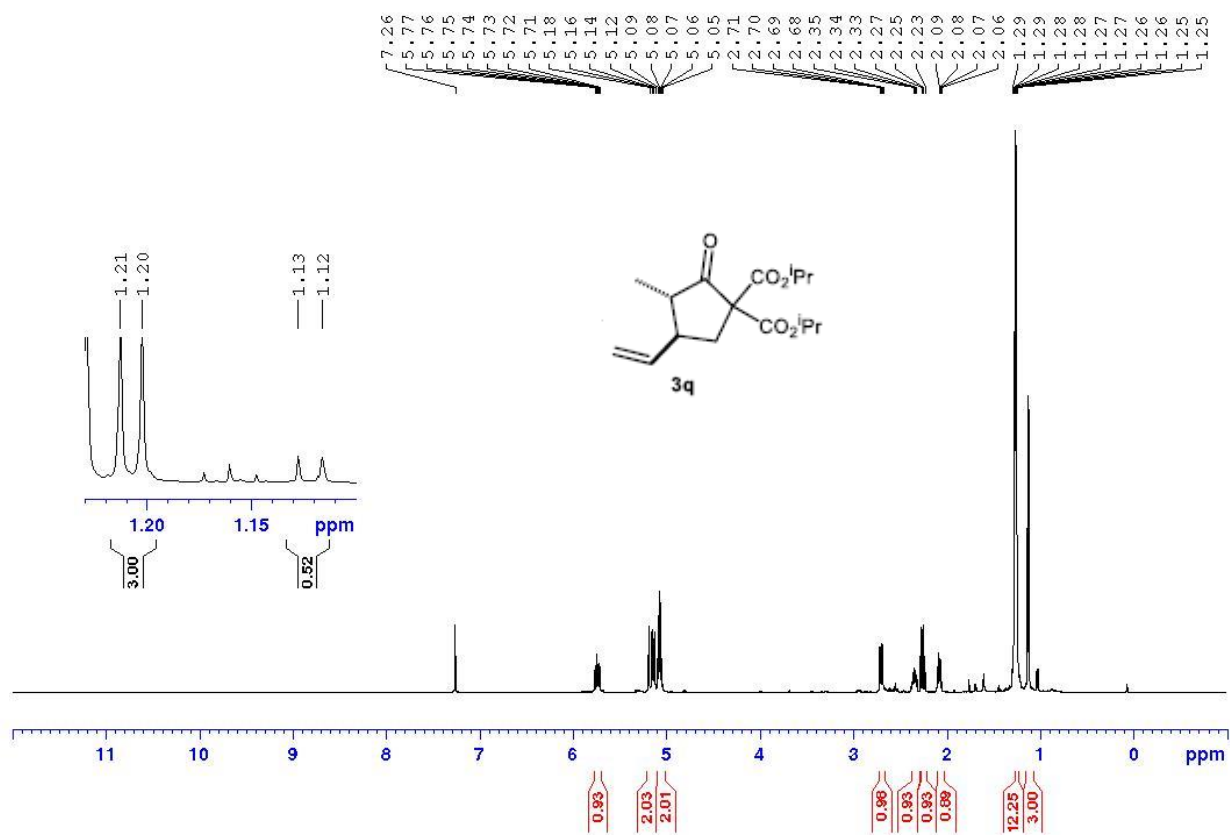

<sup>13</sup>C NMR of **3q**:

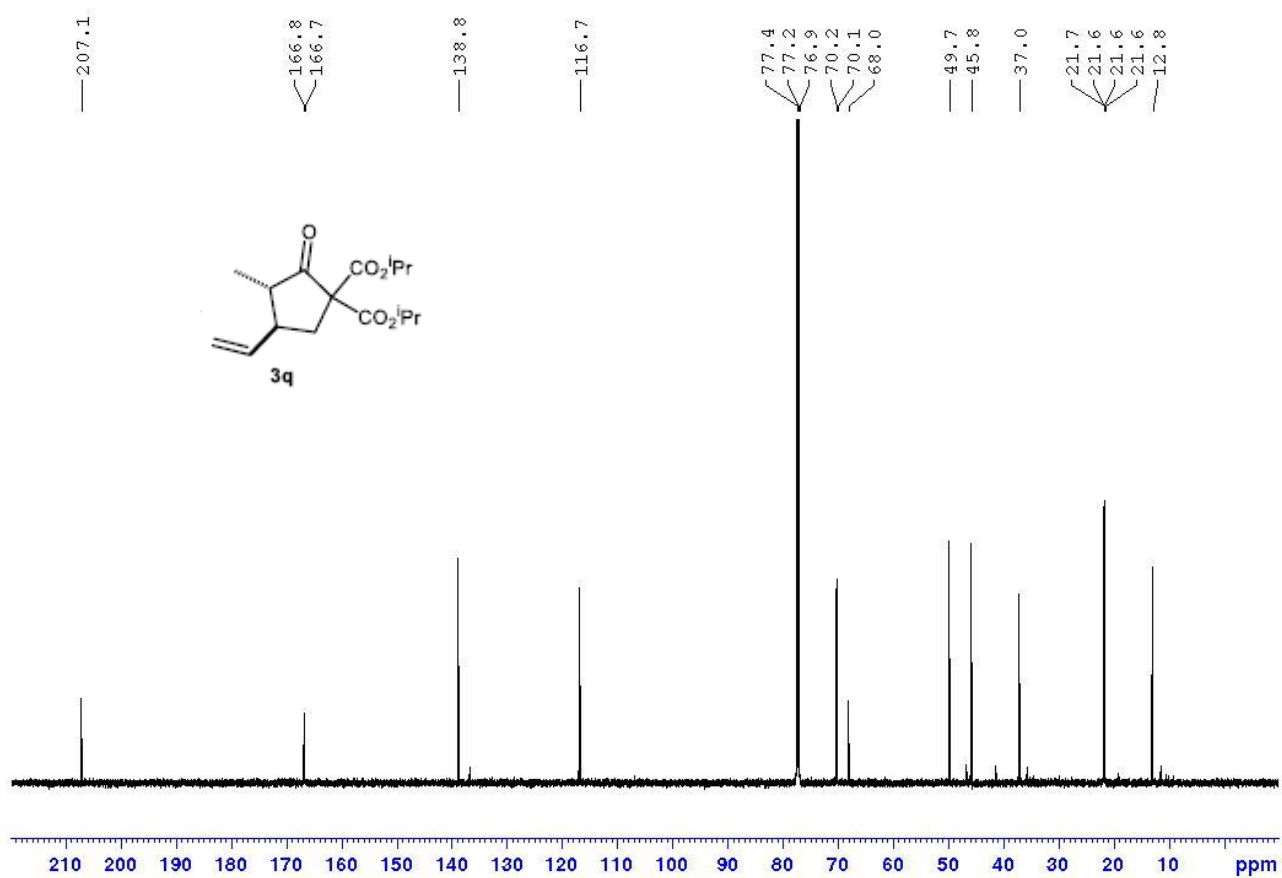



<sup>1</sup>H NMR of 3r:

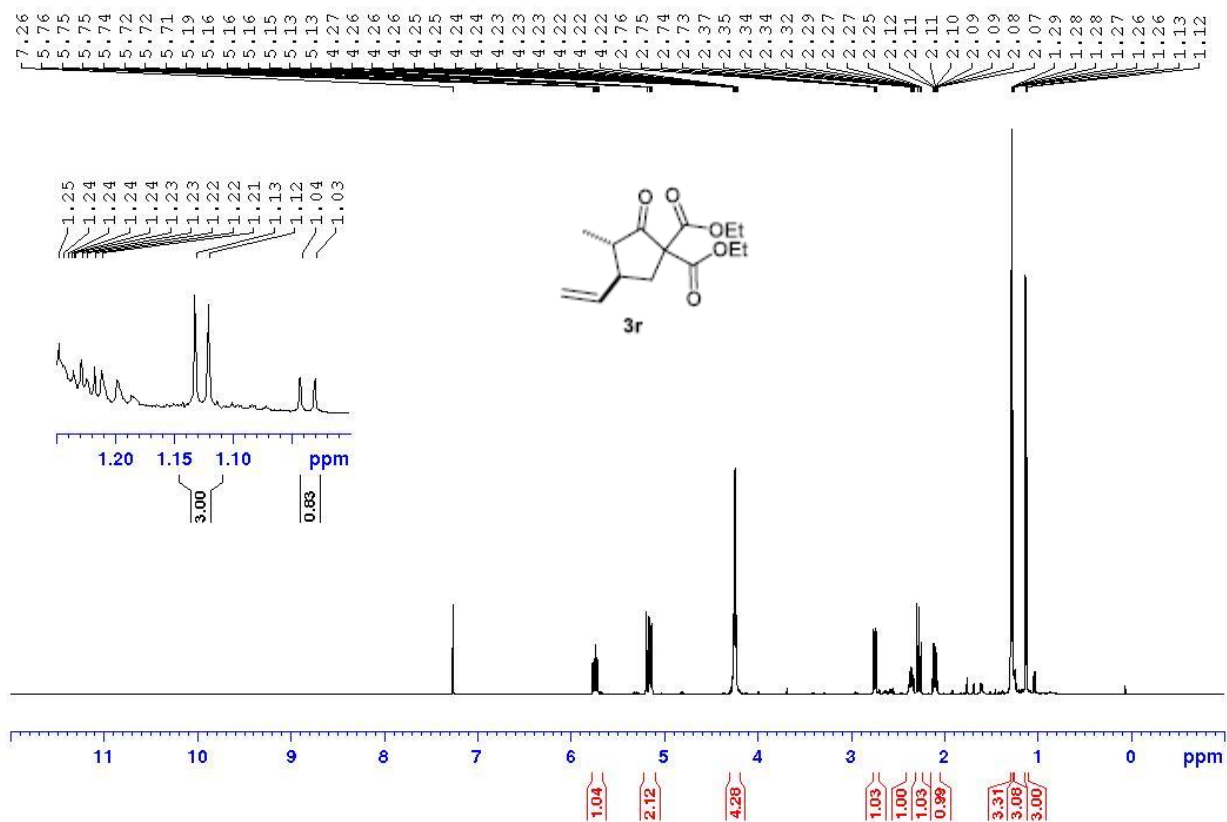

$^{13}\text{C}$  NMR of **3r**:

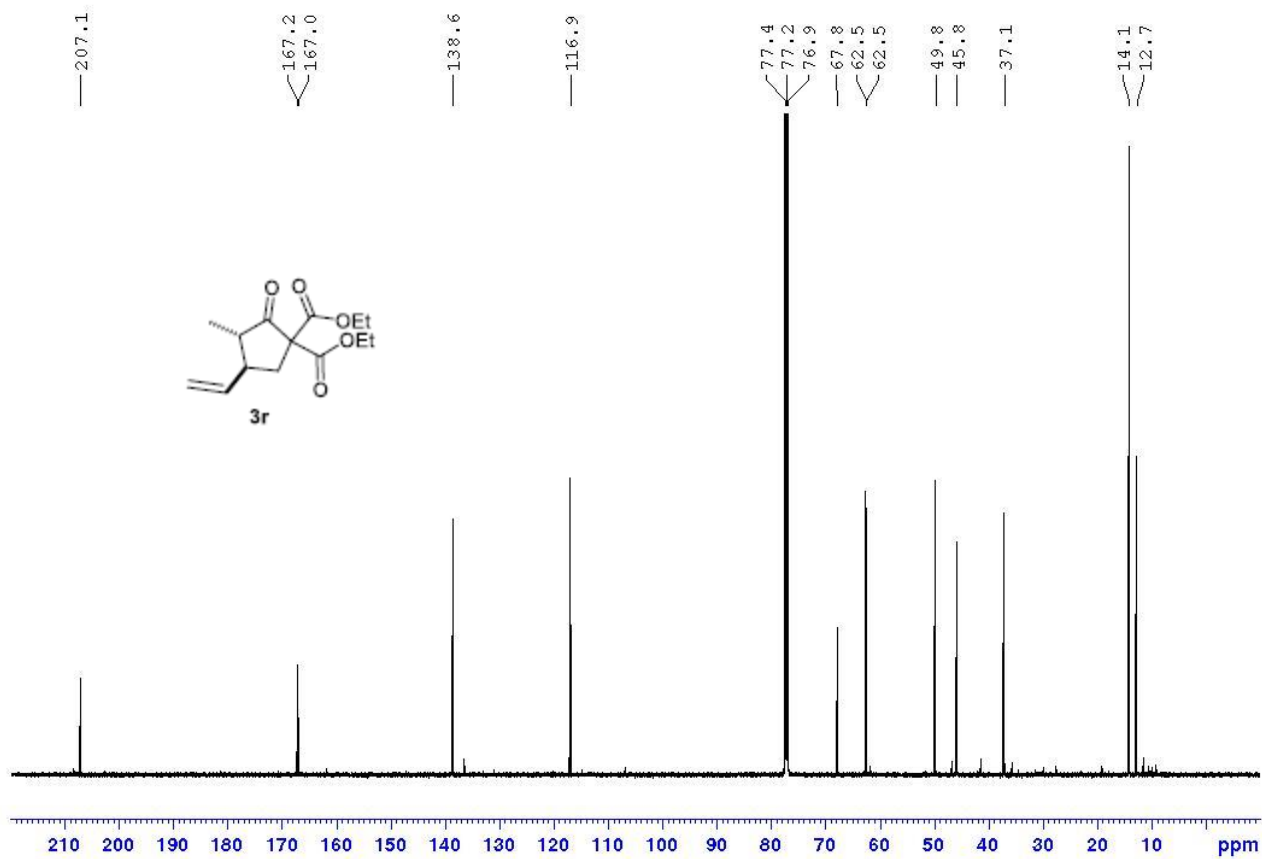

$^1\text{H}$  NMR of **3s**:

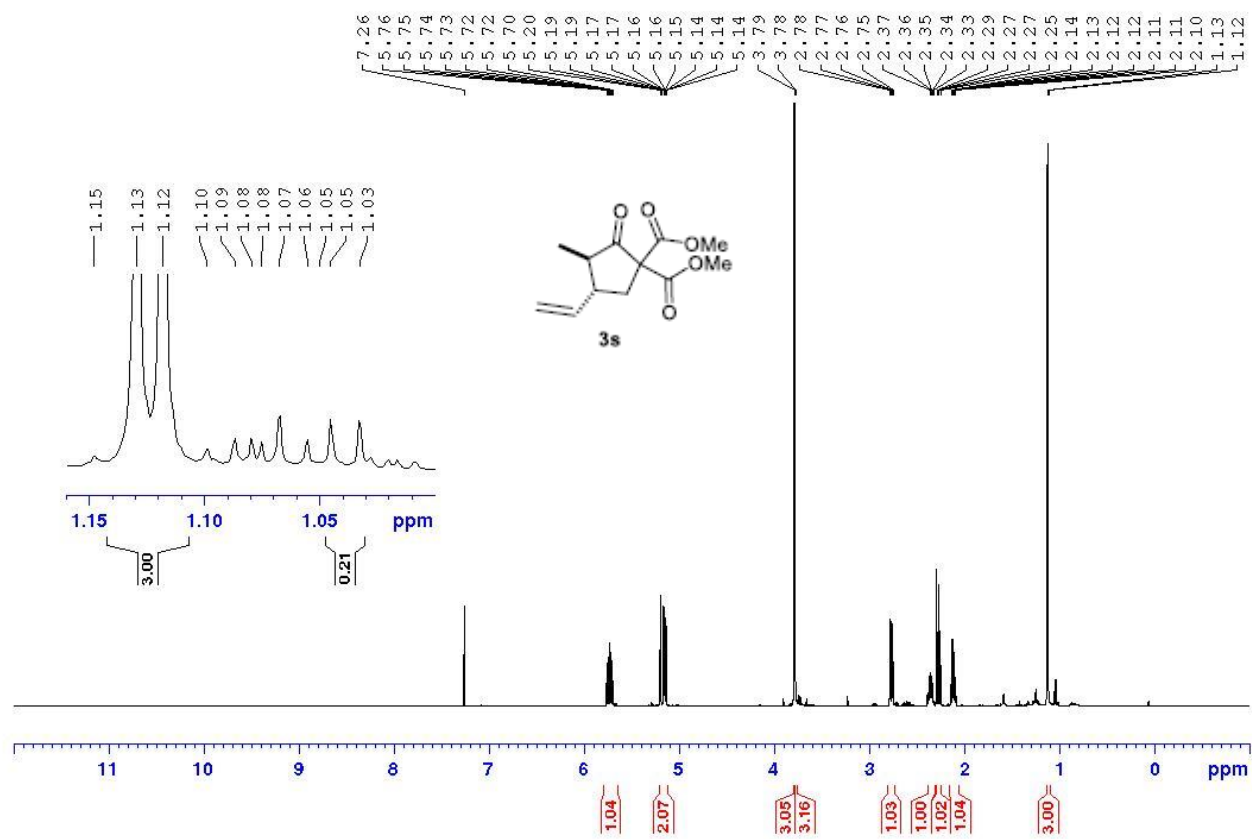

$^{13}\text{C}$  NMR of **3s**:

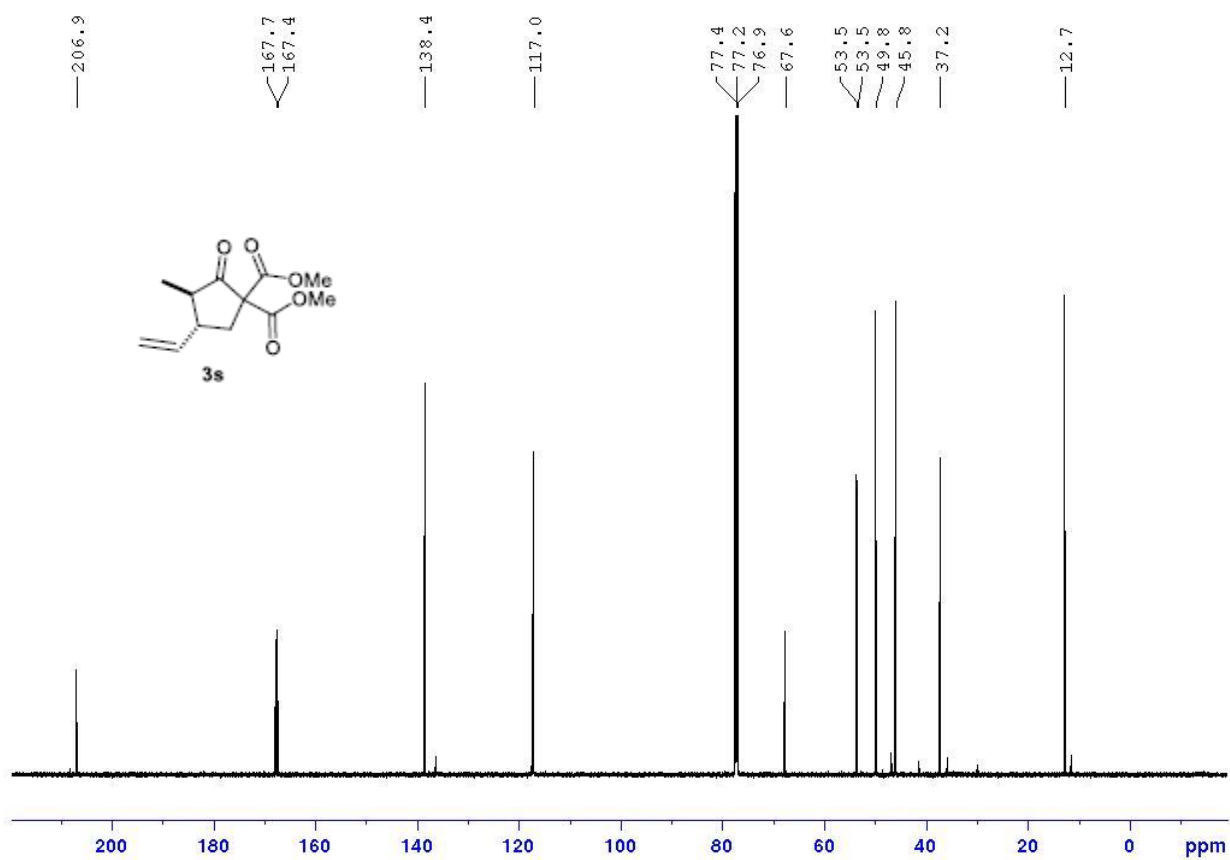

<sup>1</sup>H NMR of (-)-3c:

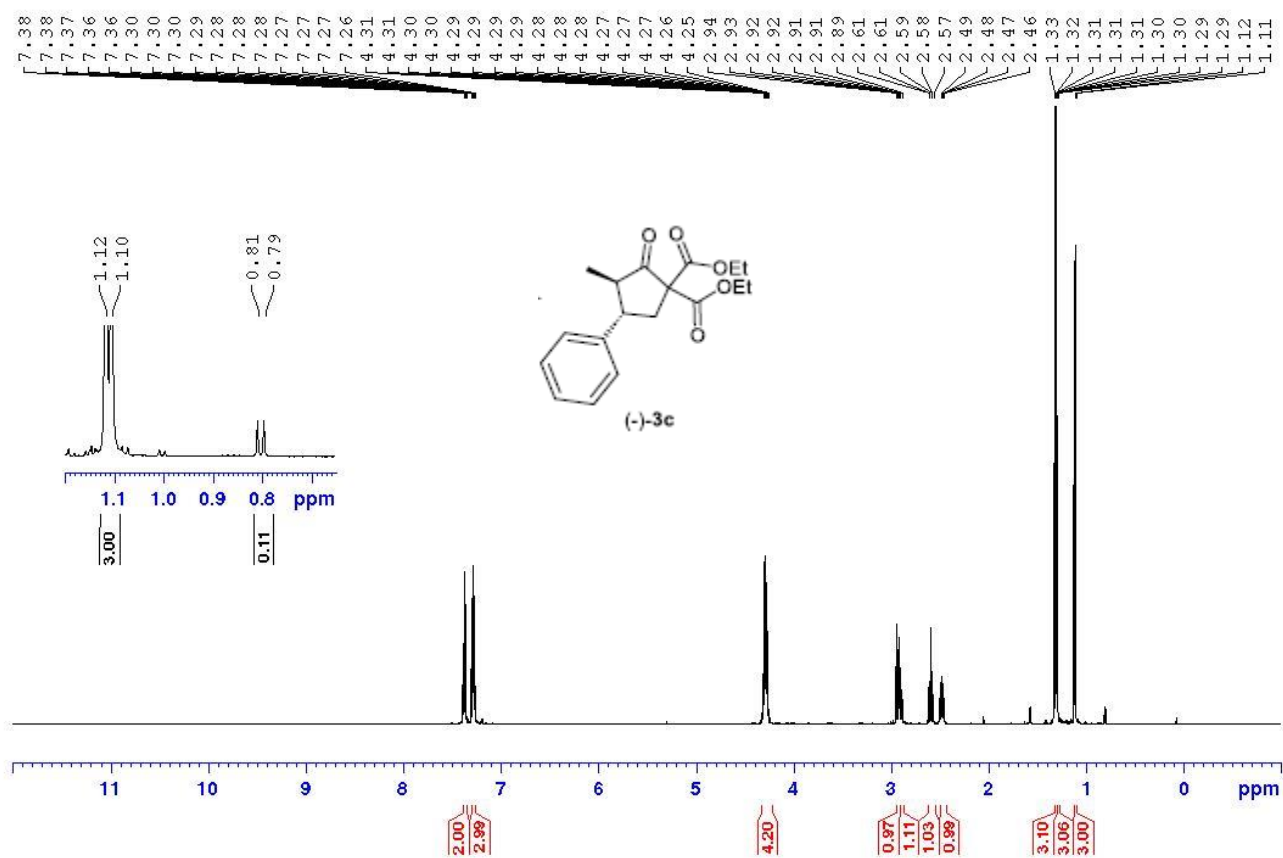

$^{13}\text{C}$  NMR of (-)-**3c**:

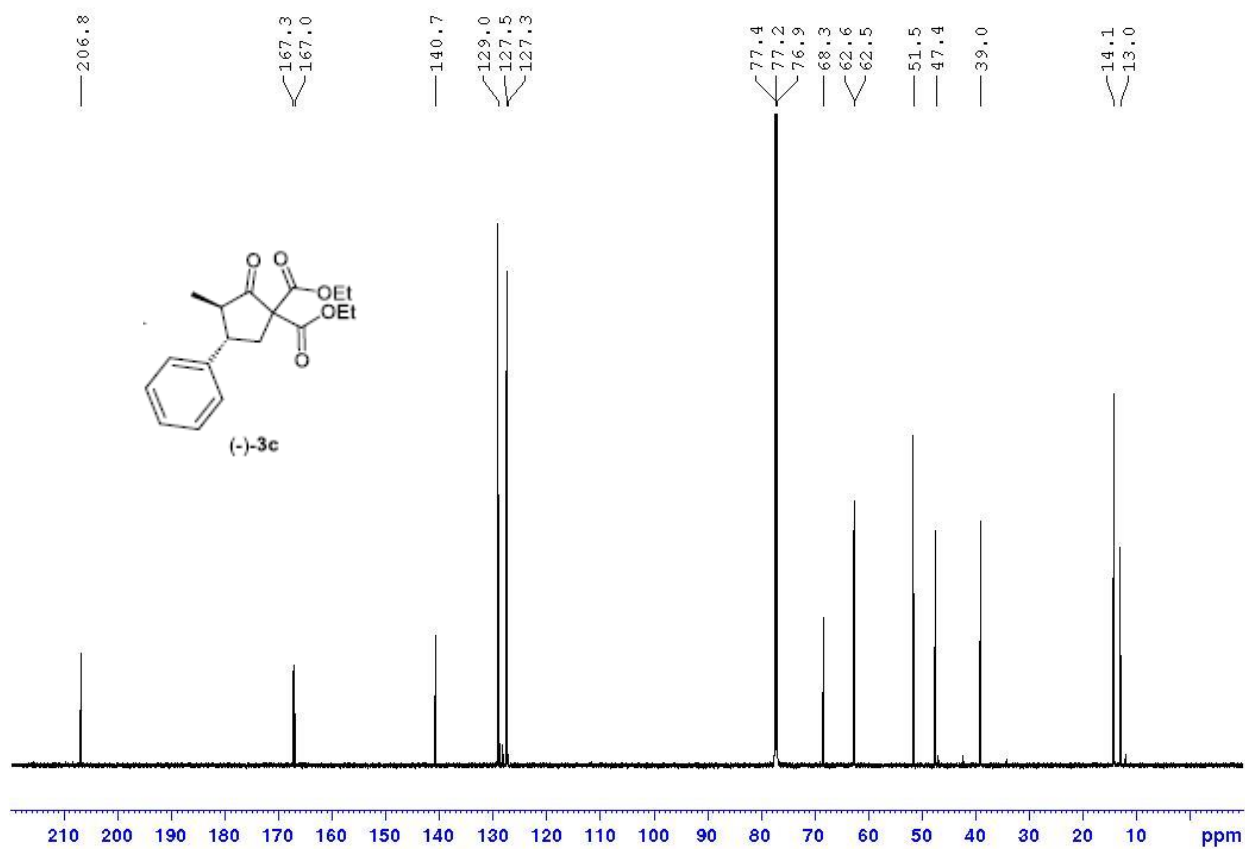

<sup>1</sup>H NMR of (+)-3c:

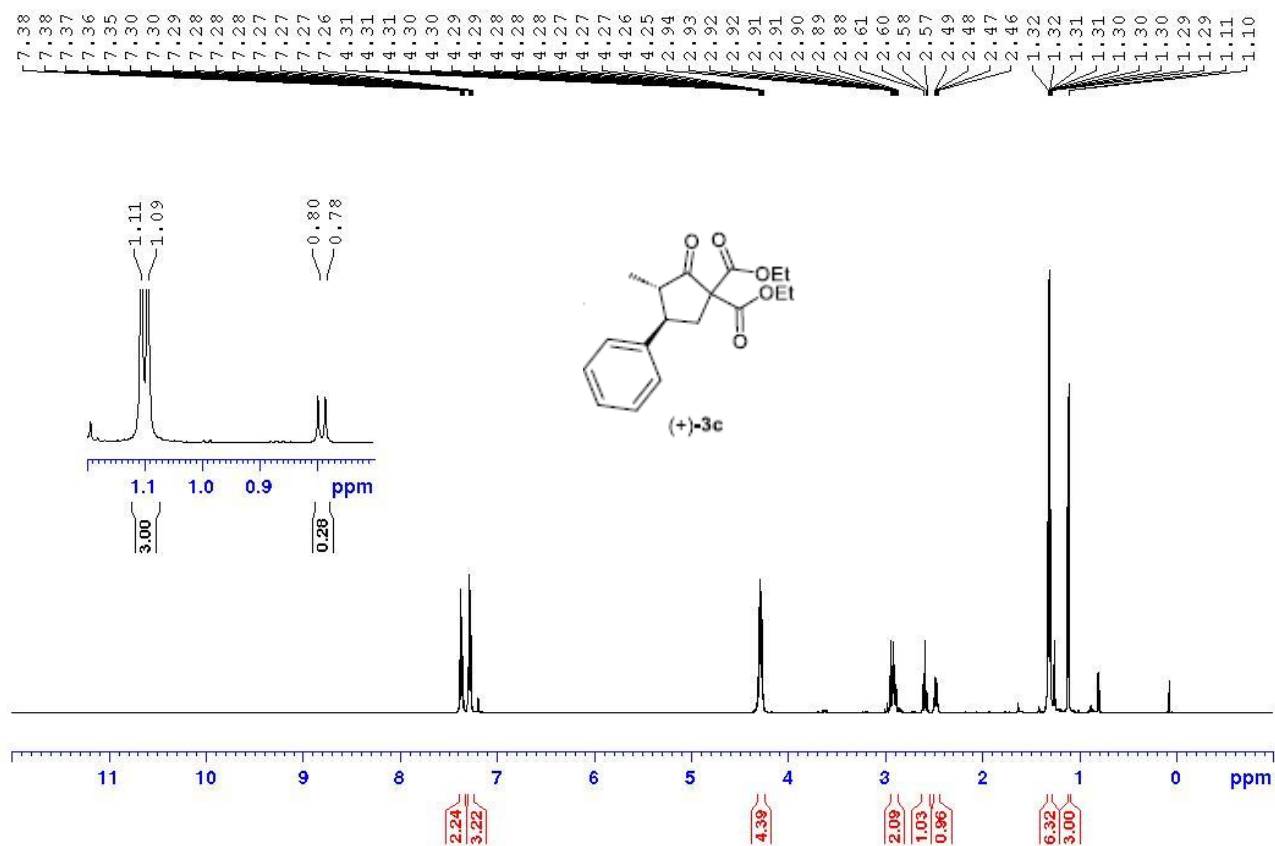

$^{13}\text{C}$  NMR of (+)-**3c**:

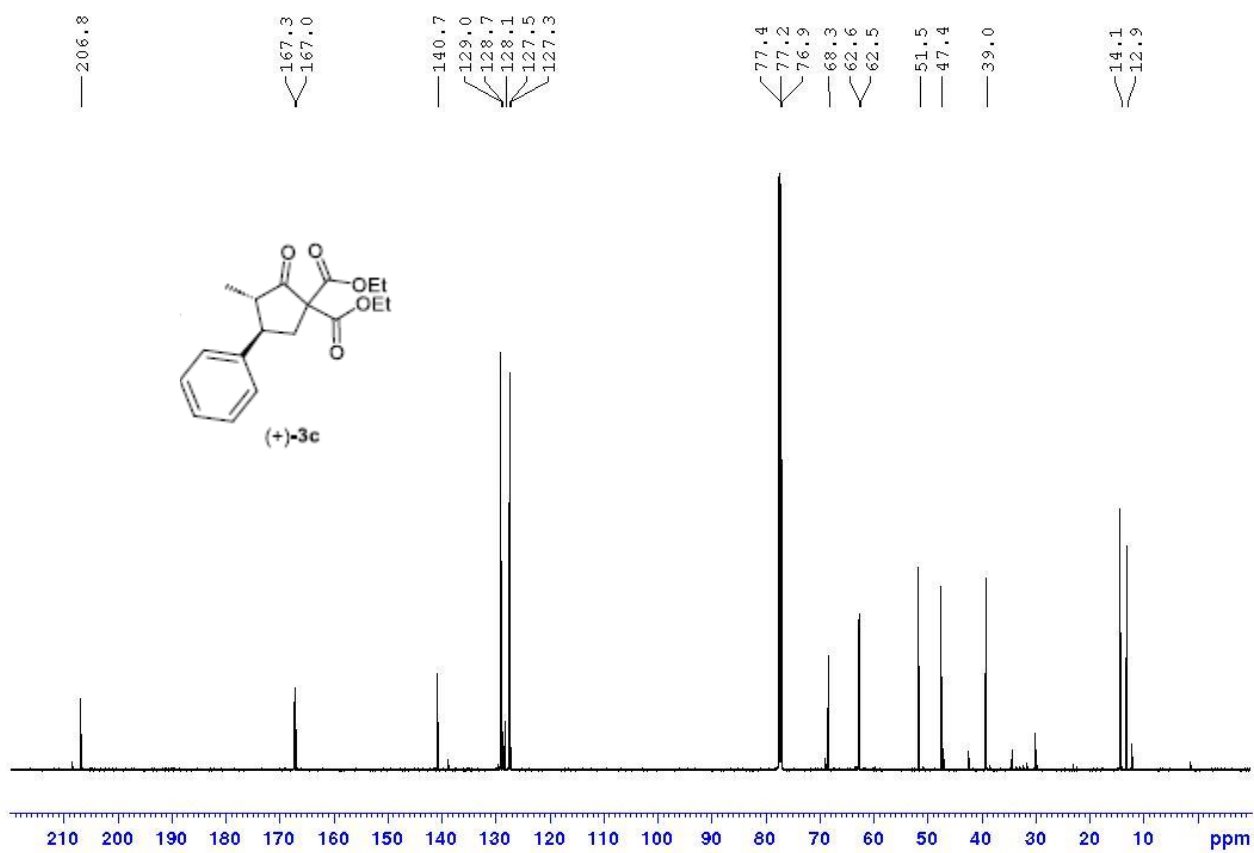



HPLC of (±)-3c:

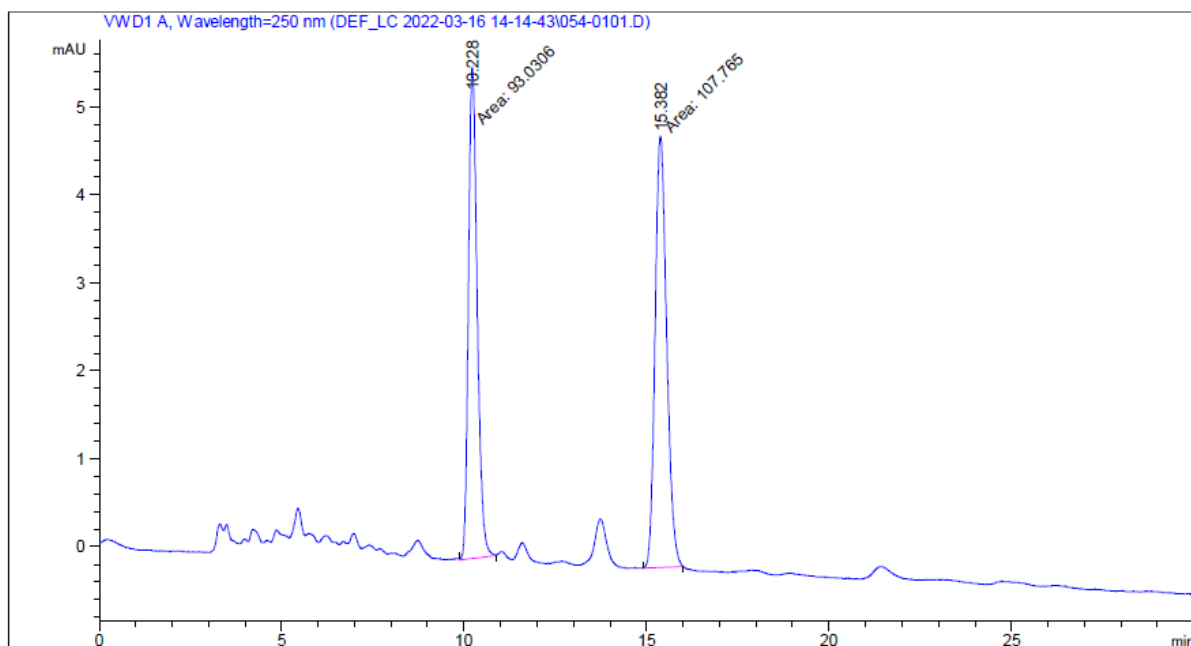

Signal 1: VWD1 A, Wavelength=250 nm

| Peak #   | RetTime [min] | Type | Width [min] | Area [mAU*s] | Height [mAU] | Area %  |
|----------|---------------|------|-------------|--------------|--------------|---------|
| 1        | 10.228        | MM   | 0.2772      | 93.03059     | 5.59353      | 46.3310 |
| 2        | 15.382        | MM   | 0.3662      | 107.76504    | 4.90498      | 53.6690 |
| Totals : |               |      |             | 200.79562    | 10.49851     |         |

HPLC of (-)-3c:

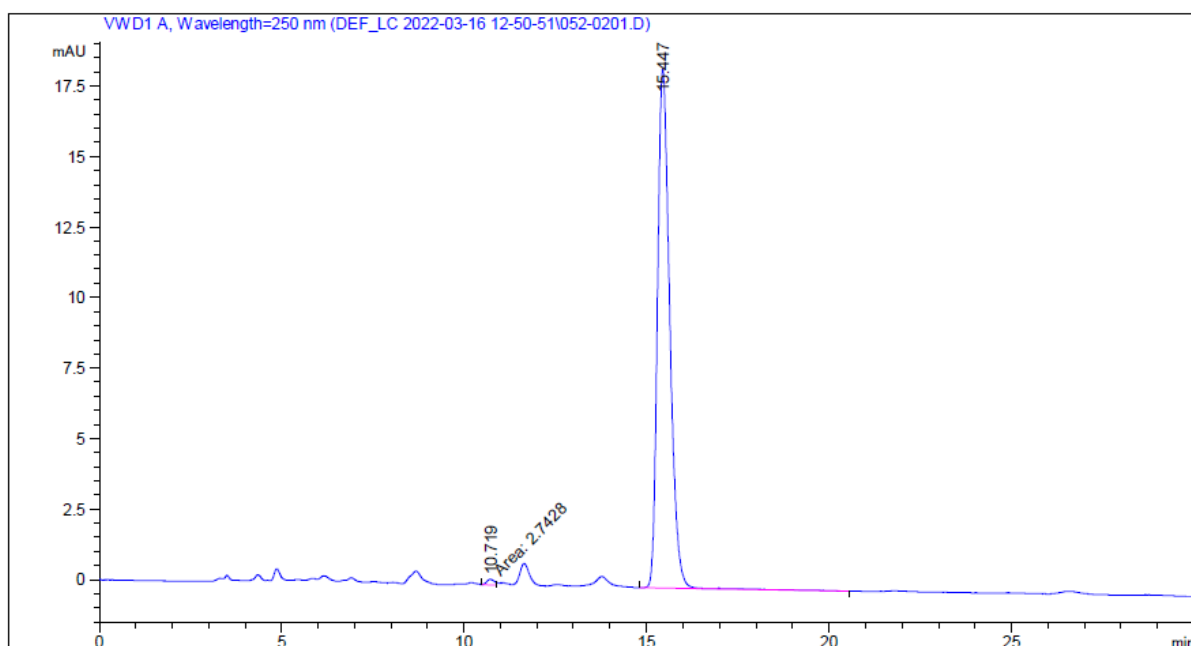

Signal 1: VWD1 A, Wavelength=250 nm

| Peak #   | RetTime [min] | Type | Width [min] | Area [mAU*s] | Height [mAU] | Area %  |
|----------|---------------|------|-------------|--------------|--------------|---------|
| 1        | 10.719        | MF   | 0.2333      | 2.74280      | 1.95942e-1   | 0.6335  |
| 2        | 15.447        | BB   | 0.3661      | 430.19397    | 18.40050     | 99.3665 |
| Totals : |               |      |             | 432.93677    | 18.59644     |         |

### HPLC of (+)-3c:

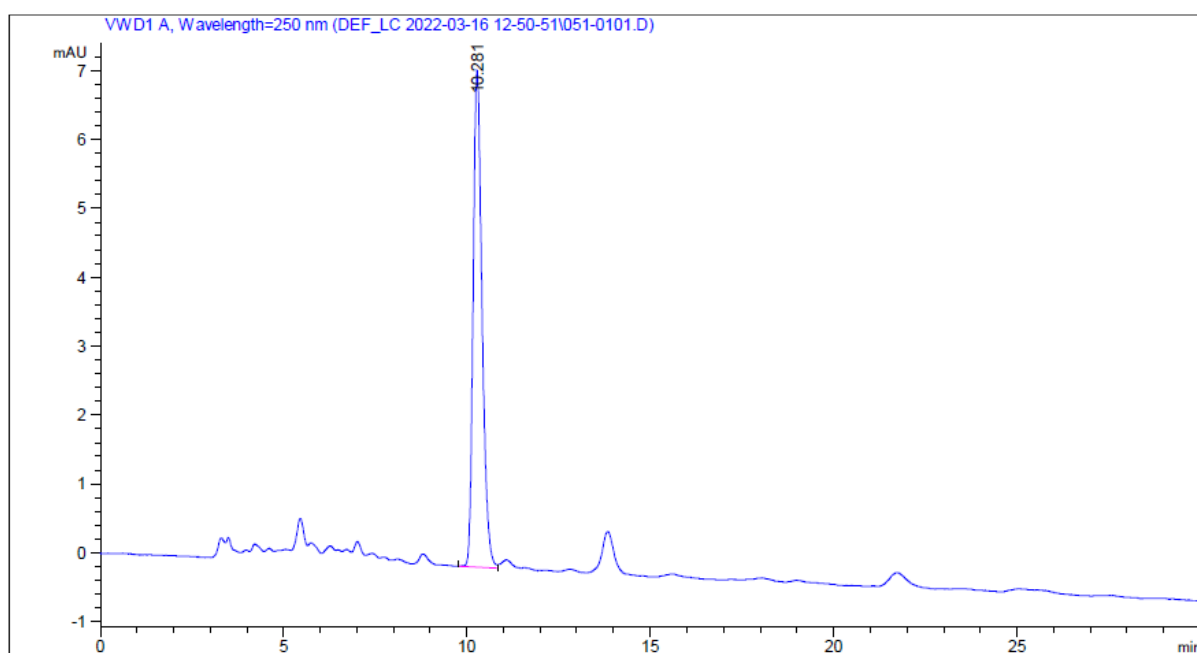

Signal 1: VWD1 A, Wavelength=250 nm

| Peak #   | RetTime [min] | Type | Width [min] | Area [mAU*s] | Height [mAU] | Area %   |
|----------|---------------|------|-------------|--------------|--------------|----------|
| 1        | 10.281        | BV   | 0.2678      | 121.96597    | 7.19289      | 100.0000 |
| Totals : |               |      |             | 121.96597    | 7.19289      |          |

<sup>1</sup>H NMR of (-)-3d:

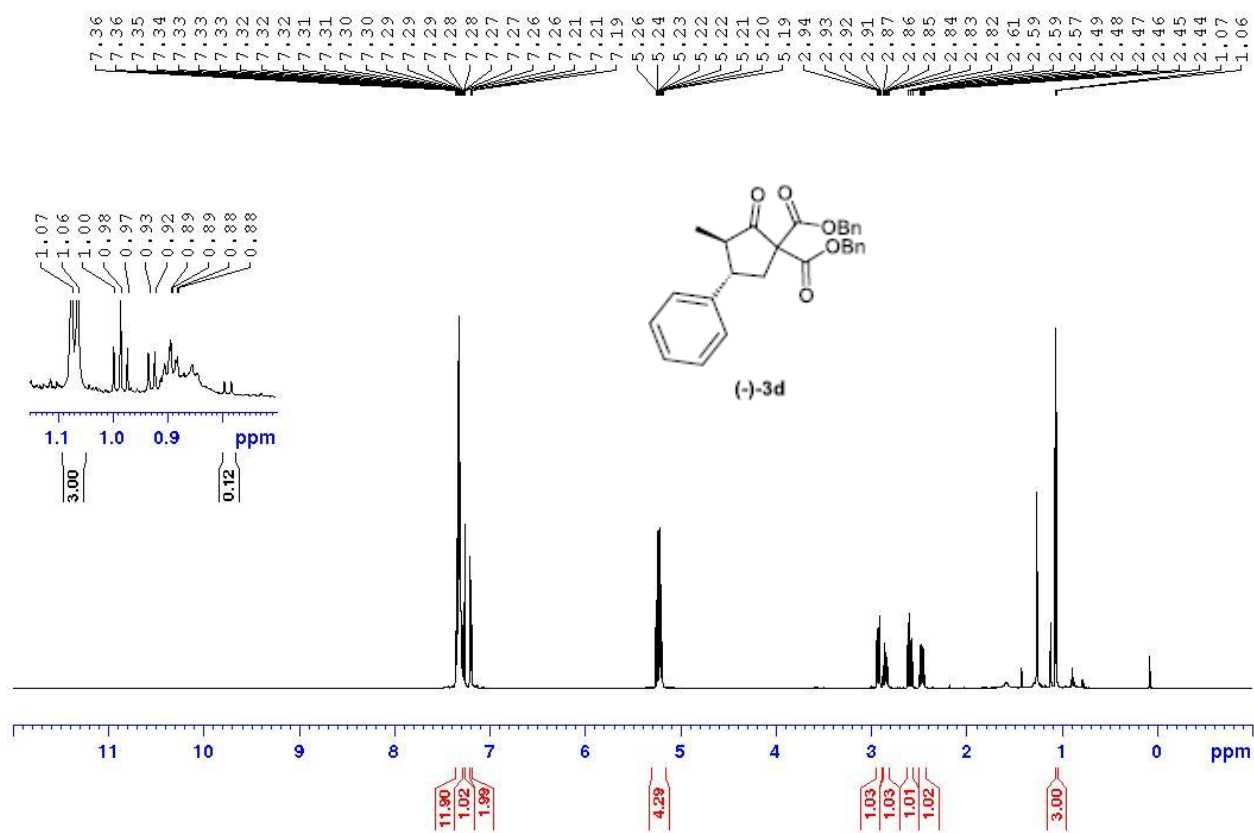

$^{13}\text{C}$  NMR of (-)-**3d**:

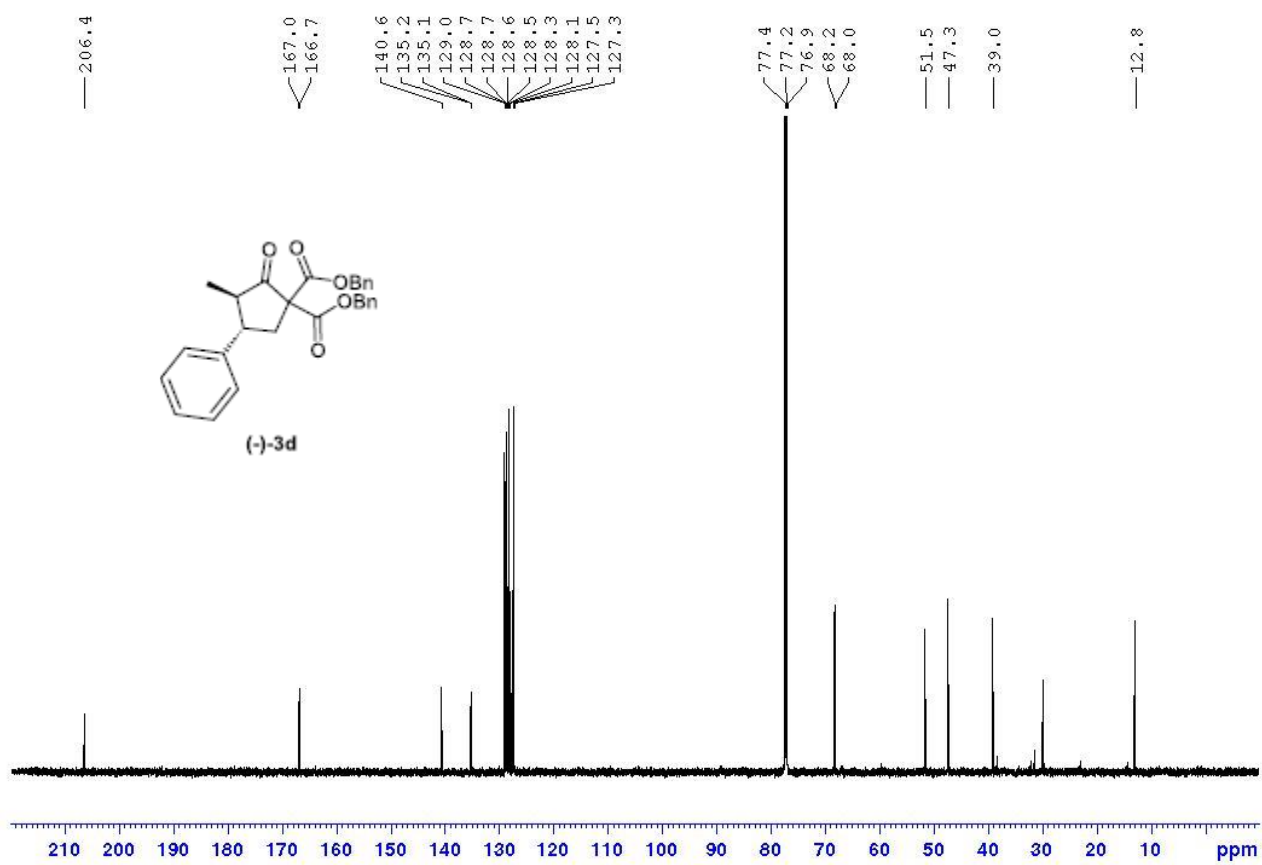

<sup>1</sup>H NMR of (+)-3d:

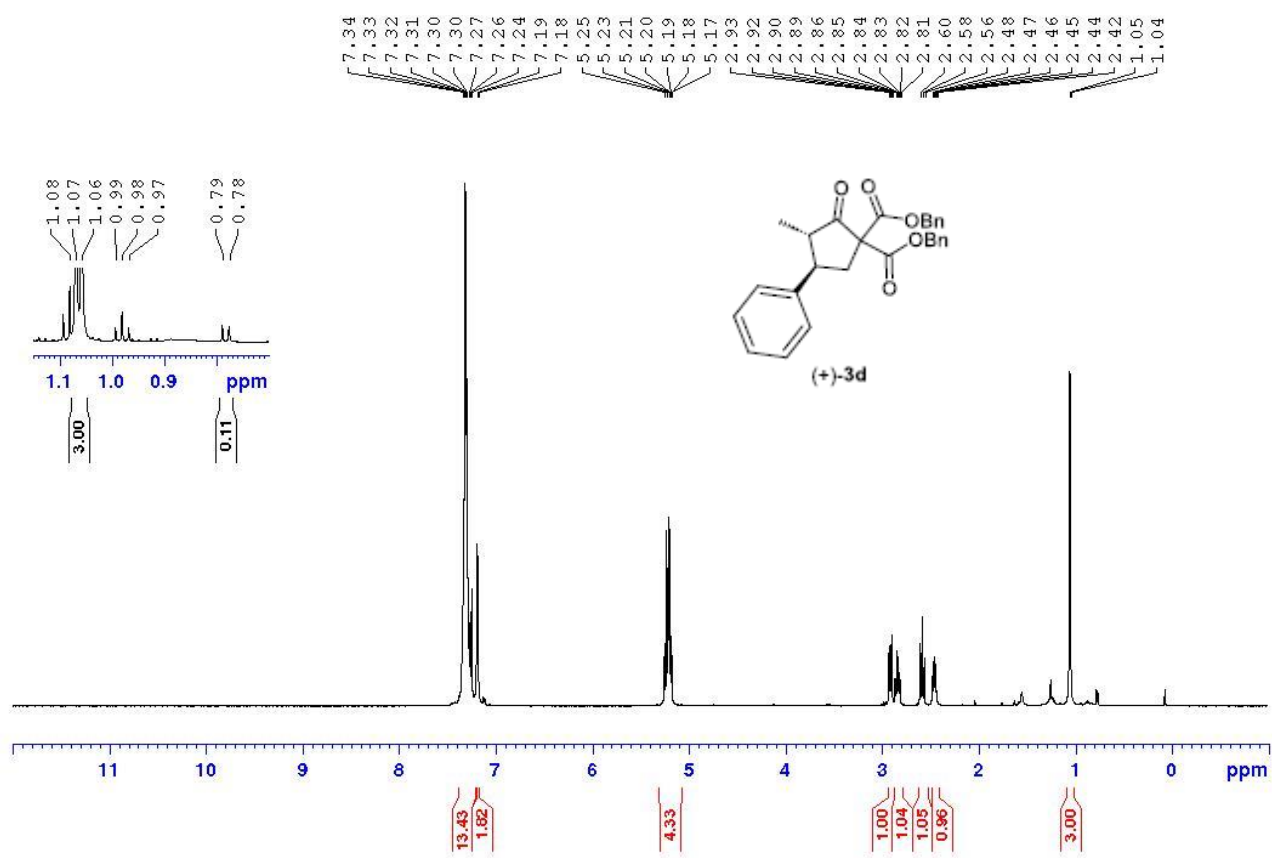

$^{13}\text{C}$  NMR of (+)-**3d**:

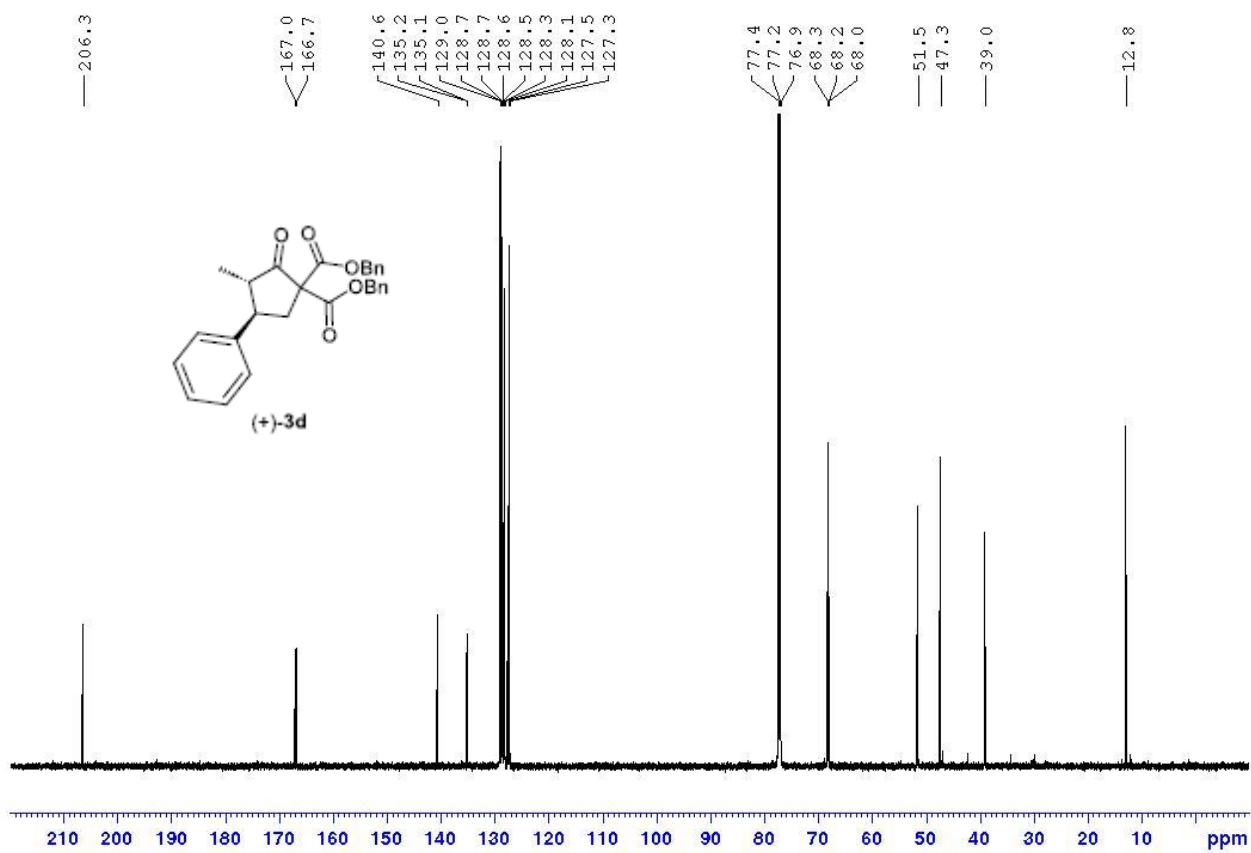

### HPLC of (±)-3d:

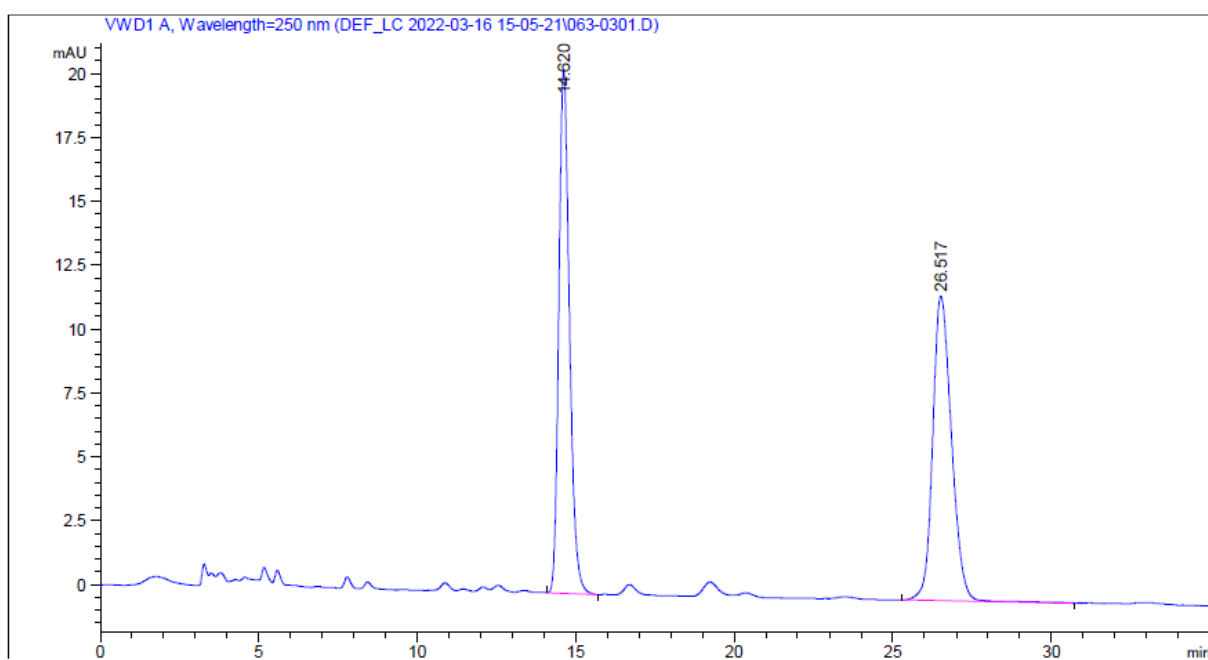

Signal 1: VWD1 A, Wavelength=250 nm

| Peak #   | RetTime [min] | Type | Width [min] | Area [mAU*s] | Height [mAU] | Area %  |
|----------|---------------|------|-------------|--------------|--------------|---------|
| 1        | 14.620        | BB   | 0.3606      | 478.25949    | 20.42881     | 49.3090 |
| 2        | 26.517        | BB   | 0.6327      | 491.66290    | 11.92206     | 50.6910 |
| Totals : |               |      |             | 969.92239    | 32.35087     |         |



HPLC of (-)-3d:

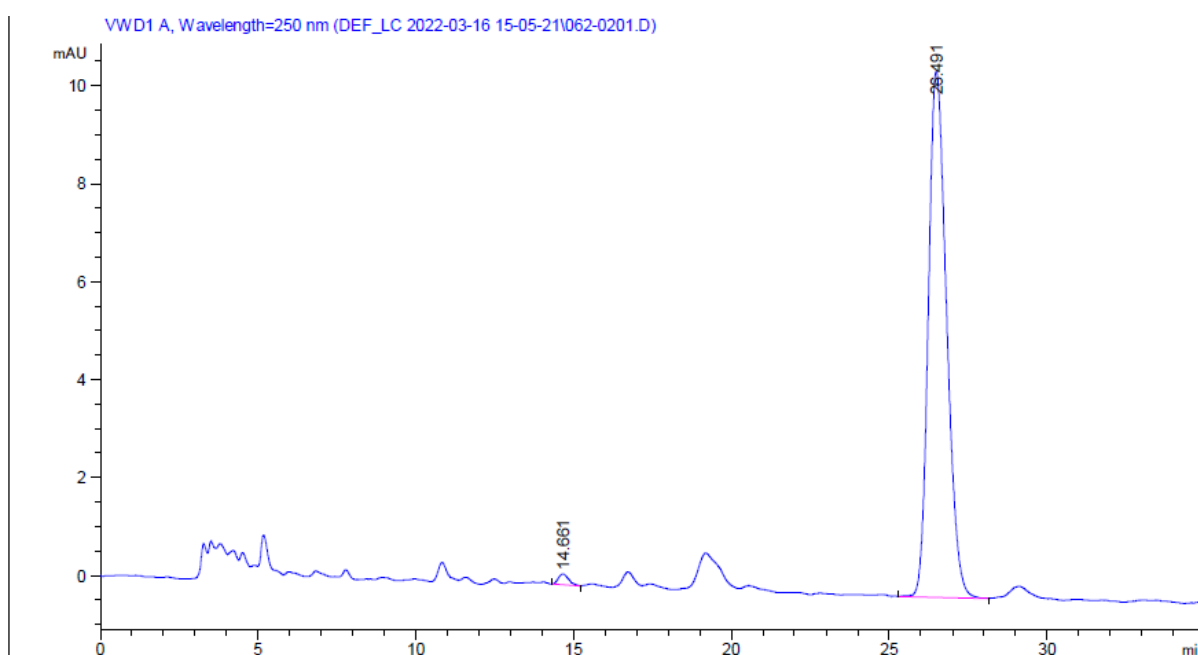

Signal 1: VWD1 A, Wavelength=250 nm

| Peak #   | RetTime [min] | Type | Width [min] | Area [mAU*s] | Height [mAU] | Area %  |
|----------|---------------|------|-------------|--------------|--------------|---------|
| 1        | 14.661        | BB   | 0.3508      | 4.99249      | 2.21160e-1   | 1.1506  |
| 2        | 26.491        | BB   | 0.6236      | 428.90231    | 10.73315     | 98.8494 |
| Totals : |               |      |             | 433.89480    | 10.95431     |         |

HPLC of (+)-3d:

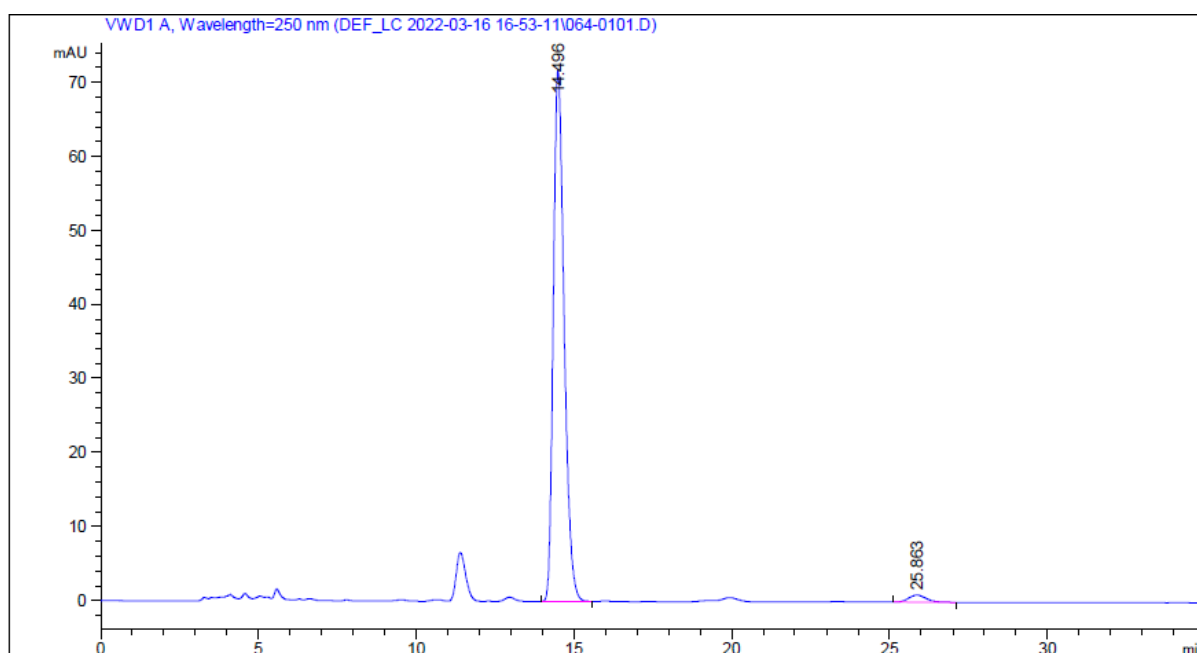

Signal 1: VWD1 A, Wavelength=250 nm

| Peak #   | RetTime [min] | Type | Width [min] | Area [mAU*s] | Height [mAU] | Area %  |
|----------|---------------|------|-------------|--------------|--------------|---------|
| 1        | 14.496        | BB   | 0.3711      | 1707.18237   | 71.68500     | 97.8788 |
| 2        | 25.863        | BB   | 0.5953      | 36.99744     | 9.60217e-1   | 2.1212  |
| Totals : |               |      |             | 1744.17982   | 72.64521     |         |

<sup>1</sup>H NMR of 5d:

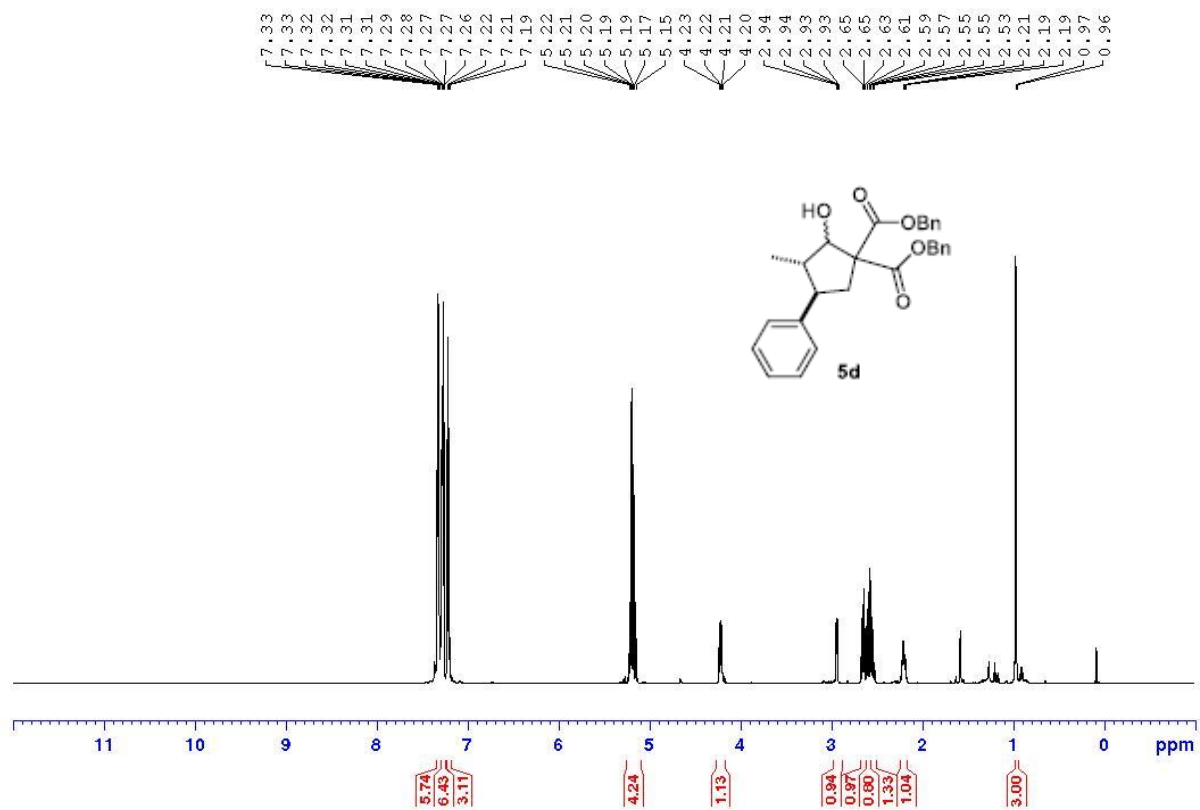

<sup>13</sup>C NMR of **5d**:

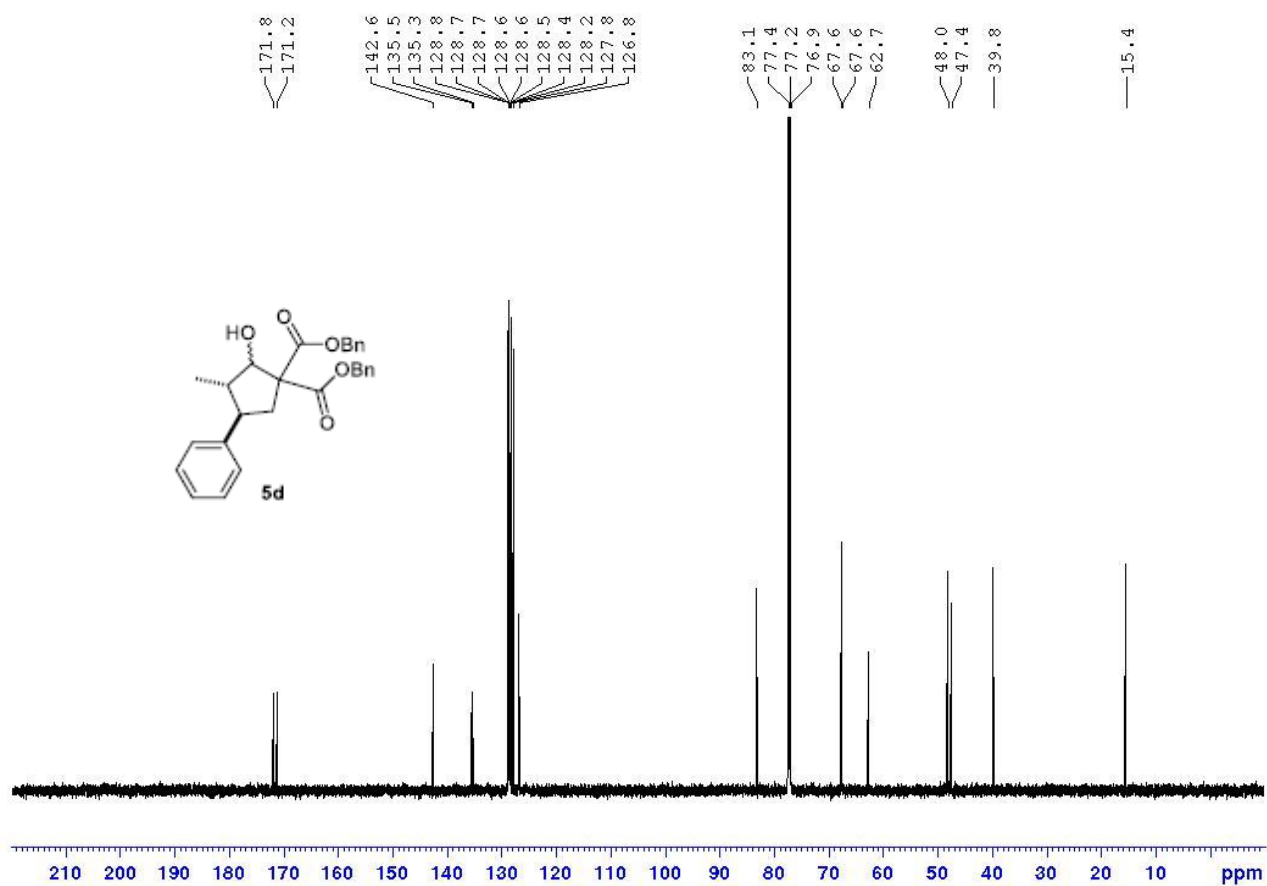

## 2D NOESY for 3c:

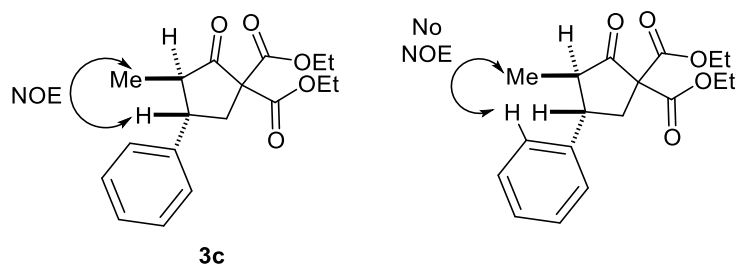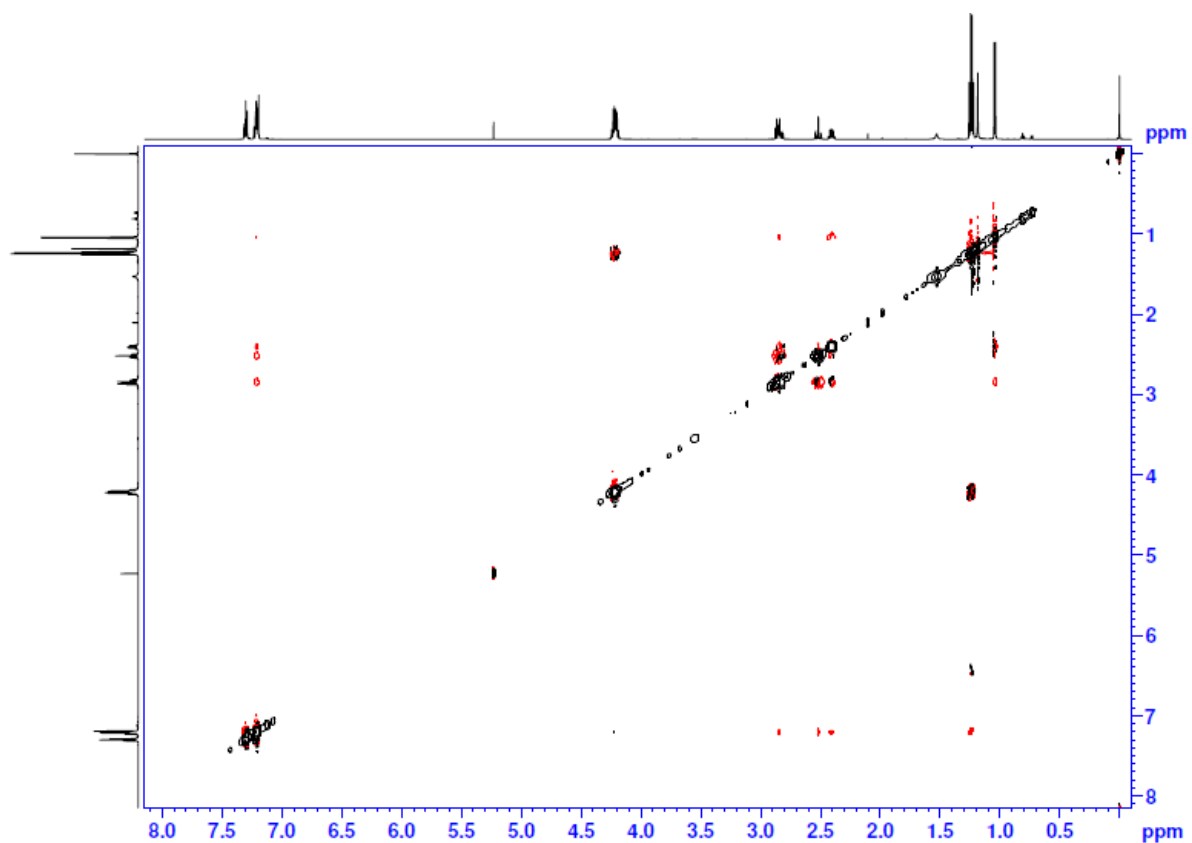

Supplement: d4ob01313a2.pdf [file d4ob01313a2.pdf]
